# Supplementary material for: Theoretical Prediction and Explanation of Reaction Site Selectivity in the Addition of a Phenoxy Group to Perfluoropyrimidine, Perfluoropyridazine, and Perfluoropyrazine
Source: MDPI journal article supplement (doi:10.3390/molecules26247637), 2021-12-16
Supplement: s1 [file s1]

**Theoretical Prediction and Explanation of Reaction Site Selectivity in  
the  
Addition of a Phenoxy Group to Perfluoropyrimidine,  
Perfluoropyridazine and Perfluoropyrazine**

Timothy J. Fuhrer<sup>1††</sup> Matthew Houck<sup>2†</sup>, Rachel M. Chapman<sup>1</sup> and Scott T. Iacono<sup>2</sup>

1. Department of Chemistry, Radford University, Radford, Virginia

2. Department of Chemistry & Chemistry Research Center,  
United States Air Force Academy, Colorado Springs, Colorado

†Co-first authors

\*Correspondence e-mail: tfuhrer@radford.edu

**SUPPLEMENTARY INFORMATION**

Figure S1: Reaction energy diagram showing the possible paths taken during second phenoxide substitutions for perfluoropyrazine.

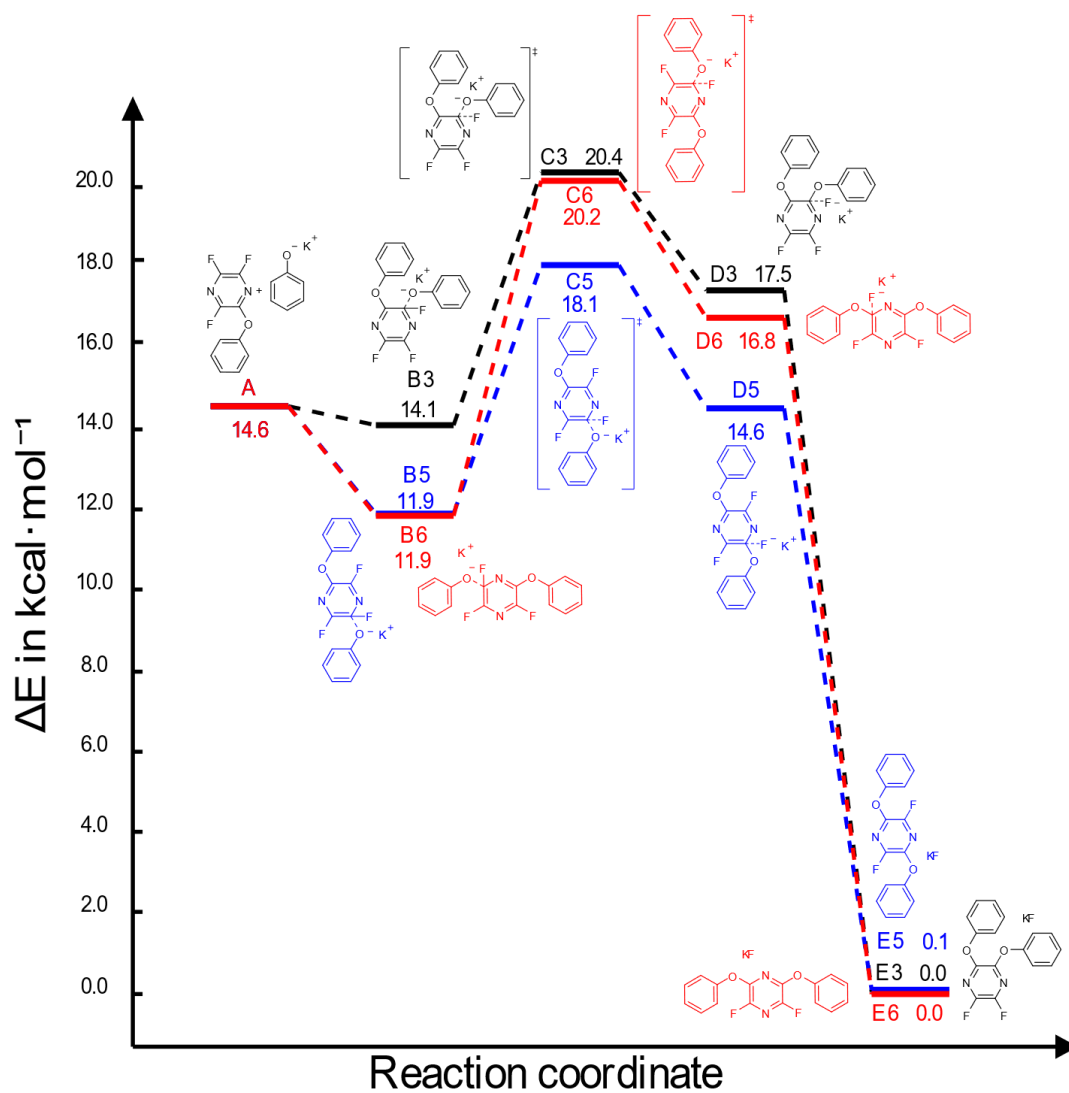

Figure S2: Reaction energy diagram showing the possible paths taken during second phenoxide substitutions for perfluoropyridazine.

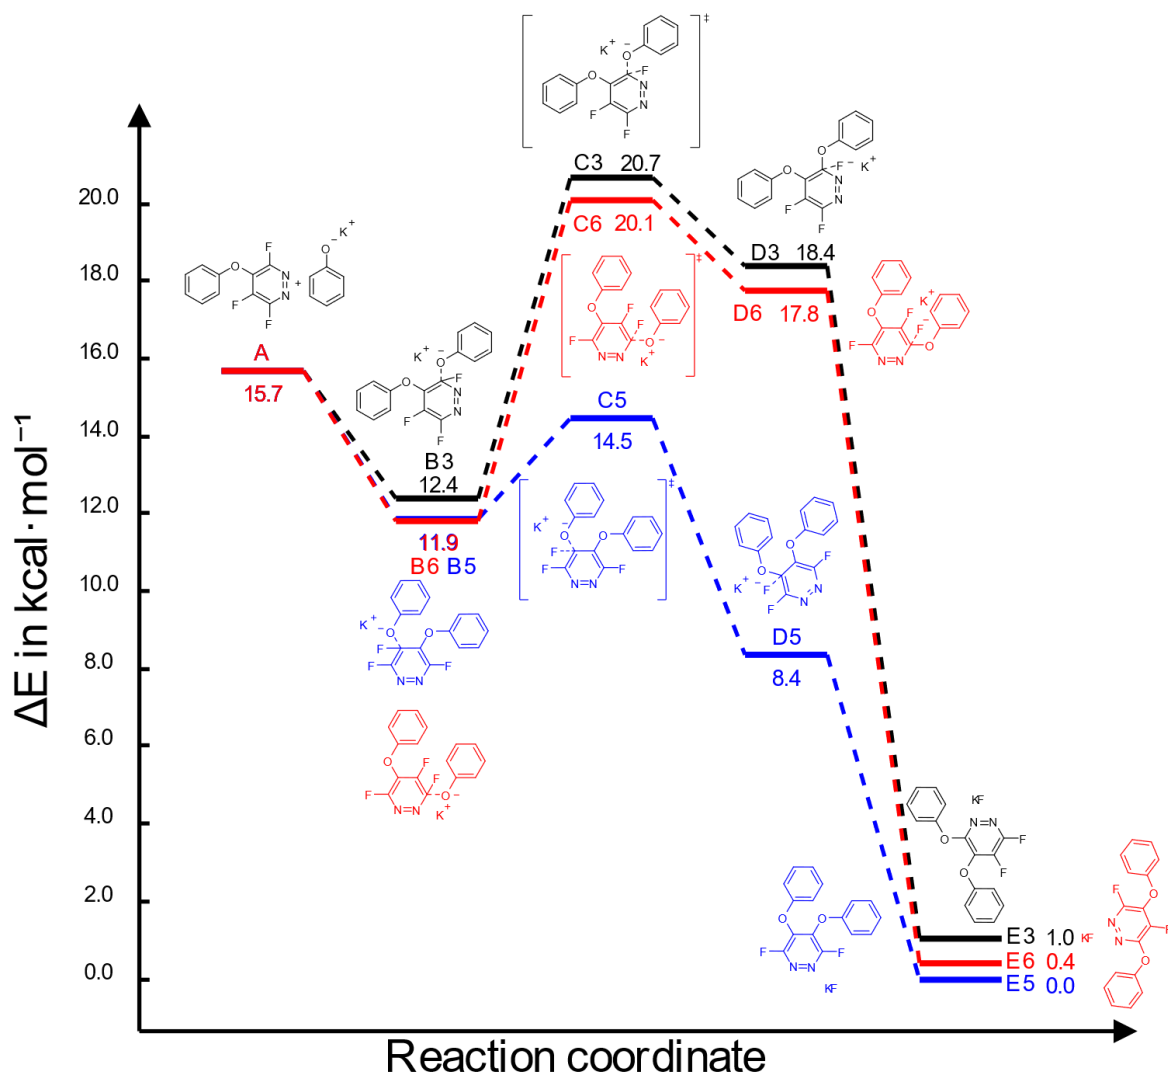

Figure S3: Reaction energy diagram showing the possible paths taken during second phenoxide substitutions for perfluoropyrimidine.

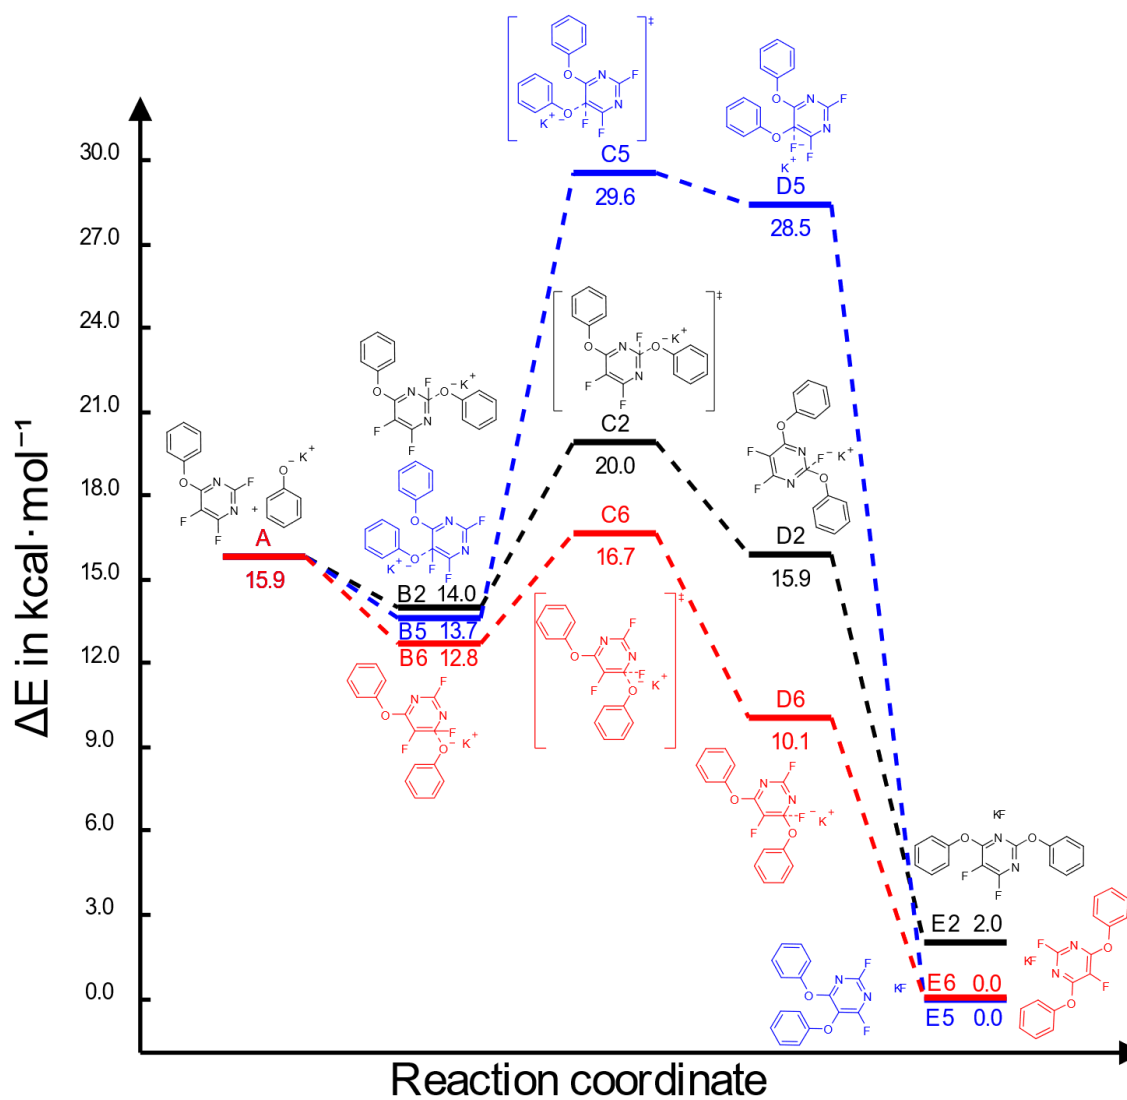

Table S1: CARTESIAN COORDINATES FOR OPTIMIZED STRUCTURES

33

3pyrazine2ndSub1stINT.xyz

|   |          |          |          |
|---|----------|----------|----------|
| C | -1.08900 | 2.17260  | 0.28630  |
| N | -0.53160 | 1.65680  | 1.35770  |
| C | 0.32620  | 0.68560  | 1.17170  |
| C | 0.68200  | 0.23360  | -0.10520 |
| N | 0.12080  | 0.77370  | -1.17110 |
| C | -0.76170 | 1.72670  | -0.98540 |
| O | 1.54070  | -0.80630 | -0.28430 |
| F | -1.98200 | 3.15190  | 0.45370  |
| F | 0.92390  | 0.17440  | 2.24480  |
| C | -4.73510 | -1.63960 | -1.06640 |
| C | -3.52660 | -2.17400 | -1.53150 |
| C | -2.37260 | -2.13180 | -0.75870 |
| C | -4.75130 | -1.06210 | 0.20980  |
| C | -3.60610 | -1.01210 | 0.99490  |
| C | -2.34460 | -1.54580 | 0.55450  |
| O | -1.28290 | -1.50070 | 1.27060  |
| H | -5.63370 | -1.67680 | -1.67470 |
| H | -3.48750 | -2.63060 | -2.51930 |
| H | -1.44300 | -2.55240 | -1.13760 |
| H | -5.67860 | -0.64150 | 0.59620  |
| H | -3.63790 | -0.56020 | 1.98470  |
| C | 5.08120  | -1.64200 | -0.29460 |
| C | 5.68790  | -0.39640 | -0.12110 |
| C | 4.89360  | 0.74060  | 0.00290  |
| C | 3.69530  | -1.75070 | -0.33970 |
| C | 2.91420  | -0.60280 | -0.21330 |
| C | 3.50140  | 0.64850  | -0.04490 |
| H | 5.68820  | -2.53550 | -0.39450 |
| H | 6.76850  | -0.31470 | -0.08520 |
| H | 5.35240  | 1.71480  | 0.13470  |
| H | 3.20630  | -2.70910 | -0.47180 |
| H | 2.89680  | 1.54370  | 0.03770  |
| F | -1.34040 | 2.26930  | -2.06380 |

33

3pyrazine2ndSub2ndINT.xyz

|   |          |         |          |
|---|----------|---------|----------|
| C | -1.20260 | 2.11090 | 0.19590  |
| N | -1.05690 | 1.30610 | 1.21700  |
| C | -0.26210 | 0.18670 | 1.07310  |
| C | 0.47290  | 0.12770 | -0.21240 |
| N | 0.28460  | 0.95830 | -1.18950 |

|   |          |          |          |
|---|----------|----------|----------|
| C | -0.57550 | 1.95730  | -1.01710 |
| O | 1.35540  | -0.93310 | -0.38600 |
| F | -2.02620 | 3.17790  | 0.38300  |
| F | 0.68250  | 0.10590  | 2.15860  |
| C | -4.42890 | -1.88460 | -0.83890 |
| C | -3.18530 | -2.33330 | -1.28370 |
| C | -2.03180 | -2.04950 | -0.55290 |
| C | -4.51480 | -1.15350 | 0.34670  |
| C | -3.36560 | -0.86520 | 1.08070  |
| C | -2.11990 | -1.31350 | 0.63190  |
| O | -0.98910 | -1.07130 | 1.37820  |
| H | -5.32520 | -2.10750 | -1.40860 |
| H | -3.11050 | -2.90680 | -2.20230 |
| H | -1.05960 | -2.39550 | -0.88630 |
| H | -5.47940 | -0.80340 | 0.70090  |
| H | -3.41540 | -0.29300 | 1.99920  |
| C | 4.91880  | -1.66140 | -0.52600 |
| C | 5.49330  | -0.44810 | -0.14350 |
| C | 4.66410  | 0.62870  | 0.16530  |
| C | 3.53560  | -1.79490 | -0.60330 |
| C | 2.71270  | -0.70920 | -0.29210 |
| C | 3.27630  | 0.50830  | 0.09480  |
| H | 5.54940  | -2.51070 | -0.76900 |
| H | 6.57150  | -0.34470 | -0.08680 |
| H | 5.09560  | 1.57780  | 0.46760  |
| H | 3.07720  | -2.73190 | -0.90060 |
| H | 2.64190  | 1.34960  | 0.34120  |
| F | -0.77580 | 2.81810  | -2.06310 |

32

3pyrazine2ndSubPRODUCT.xyz

|   |          |          |          |
|---|----------|----------|----------|
| C | 0.69020  | 2.43390  | 0.00150  |
| N | 1.37450  | 1.30850  | 0.00140  |
| C | 0.71000  | 0.17440  | -0.00080 |
| C | -0.71010 | 0.17480  | -0.00290 |
| N | -1.37390 | 1.30920  | -0.00270 |
| C | -0.68900 | 2.43430  | -0.00050 |
| O | -1.33470 | -1.02210 | -0.00520 |
| F | 1.37980  | 3.58310  | 0.00380  |
| C | 5.49470  | -1.31010 | 0.00060  |
| C | 4.79850  | -1.25600 | 1.20800  |
| C | 3.40980  | -1.13080 | 1.21340  |
| C | 4.80050  | -1.24310 | -1.20730 |
| C | 3.41180  | -1.11790 | -1.21370 |
| C | 2.73790  | -1.06260 | -0.00030 |
| O | 1.33410  | -1.02280 | -0.00080 |

|   |          |          |          |
|---|----------|----------|----------|
| H | 6.57470  | -1.40920 | 0.00100  |
| H | 5.33390  | -1.31280 | 2.14960  |
| H | 2.85140  | -1.09330 | 2.14180  |
| H | 5.33750  | -1.28980 | -2.14850 |
| H | 2.85500  | -1.07050 | -2.14250 |
| C | -4.79790 | -1.24470 | 1.20990  |
| C | -5.49520 | -1.30980 | 0.00370  |
| C | -4.80220 | -1.25340 | -1.20550 |
| C | -3.40930 | -1.11930 | 1.21290  |
| C | -2.73850 | -1.06180 | -0.00210 |
| C | -3.41360 | -1.12790 | -1.21420 |
| H | -5.33240 | -1.29320 | 2.15240  |
| H | -6.57520 | -1.40910 | 0.00600  |
| H | -5.34010 | -1.30860 | -2.14570 |
| H | -2.85010 | -1.07350 | 2.14040  |
| H | -2.85760 | -1.08850 | -2.14400 |
| F | -1.37790 | 3.58390  | -0.00040 |

33

3TSpyrazine2ndSub.xyz

|   |          |          |          |
|---|----------|----------|----------|
| C | -1.21120 | 2.09710  | 0.22610  |
| N | -0.85880 | 1.42420  | 1.29810  |
| C | -0.09020 | 0.33860  | 1.12430  |
| C | 0.52870  | 0.15760  | -0.16830 |
| N | 0.17270  | 0.86150  | -1.20580 |
| C | -0.71960 | 1.82610  | -1.03020 |
| O | 1.42910  | -0.87360 | -0.33380 |
| F | -2.05140 | 3.13910  | 0.40870  |
| F | 0.70790  | 0.03980  | 2.19660  |
| C | -4.53370 | -1.58710 | -0.91960 |
| C | -3.31700 | -2.12070 | -1.35210 |
| C | -2.16460 | -1.97200 | -0.58530 |
| C | -4.58110 | -0.90580 | 0.29930  |
| C | -3.43240 | -0.75140 | 1.07080  |
| C | -2.19240 | -1.28450 | 0.64990  |
| O | -1.09810 | -1.15990 | 1.39500  |
| H | -5.43110 | -1.70780 | -1.51790 |
| H | -3.26720 | -2.65800 | -2.29550 |
| H | -1.22040 | -2.39350 | -0.91650 |
| H | -5.52200 | -0.49030 | 0.65010  |
| H | -3.46860 | -0.22730 | 2.02060  |
| C | 5.00350  | -1.54300 | -0.43950 |
| C | 5.55470  | -0.30200 | -0.11470 |
| C | 4.70770  | 0.77420  | 0.14100  |
| C | 3.62350  | -1.70560 | -0.50920 |

|   |          |          |          |
|---|----------|----------|----------|
| C | 2.78510  | -0.61950 | -0.25080 |
| C | 3.32190  | 0.62560  | 0.07580  |
| H | 5.64990  | -2.39090 | -0.64130 |
| H | 6.63070  | -0.17710 | -0.06210 |
| H | 5.12220  | 1.74410  | 0.39600  |
| H | 3.18030  | -2.66310 | -0.75970 |
| H | 2.67290  | 1.46930  | 0.27540  |
| F | -1.08880 | 2.55420  | -2.11530 |

33

5secondSub2ndIntPyrazine.xyz

|   |          |          |          |
|---|----------|----------|----------|
| N | 0.34470  | 0.49370  | -1.06100 |
| C | -0.65920 | 1.27480  | -0.95070 |
| C | -1.41570 | 1.54390  | 0.29250  |
| N | -0.85150 | 0.96400  | 1.40820  |
| C | 0.18740  | 0.17940  | 1.25160  |
| C | 0.81100  | -0.10770 | 0.05990  |
| O | 1.80270  | -1.07320 | -0.06310 |
| F | -1.13440 | 1.88250  | -2.08090 |
| F | -1.54270 | 2.96380  | 0.47350  |
| C | -3.90060 | -2.76070 | -0.40110 |
| C | -3.82260 | -2.22680 | 0.88580  |
| C | -3.45870 | -0.89440 | 1.07470  |
| C | -3.62050 | -1.95150 | -1.50210 |
| C | -3.25750 | -0.61760 | -1.32020 |
| C | -3.17480 | -0.08750 | -0.02980 |
| O | -2.85570 | 1.24230  | 0.14630  |
| H | -4.18340 | -3.79830 | -0.54470 |
| H | -4.04300 | -2.84960 | 1.74700  |
| H | -3.38870 | -0.46680 | 2.06760  |
| H | -3.68380 | -2.35780 | -2.50660 |
| H | -3.03900 | 0.02220  | -2.16780 |
| C | 5.41050  | -1.43200 | -0.33100 |
| C | 5.85880  | -0.11540 | -0.20360 |
| C | 4.92800  | 0.90650  | -0.02780 |
| C | 4.05090  | -1.72080 | -0.28340 |
| C | 3.12480  | -0.68880 | -0.10430 |
| C | 3.56070  | 0.63040  | 0.02190  |
| H | 6.12240  | -2.23950 | -0.46880 |
| H | 6.91930  | 0.10910  | -0.24190 |
| H | 5.26250  | 1.93440  | 0.07140  |
| H | 3.68660  | -2.73800 | -0.38030 |
| H | 2.84230  | 1.43000  | 0.15480  |
| F | 0.67280  | -0.38590 | 2.39210  |



33

5secondSubFirstIntPyrazine.xyz

|   |          |          |          |
|---|----------|----------|----------|
| N | 0.30460  | 0.79660  | -0.98030 |
| C | -0.53180 | 1.77170  | -0.77860 |
| C | -0.95980 | 2.11920  | 0.50990  |
| N | -0.53160 | 1.47710  | 1.56100  |
| C | 0.30510  | 0.47770  | 1.35080  |
| C | 0.74300  | 0.12300  | 0.08570  |
| O | 1.57290  | -0.94380 | -0.10280 |
| F | -0.95890 | 2.47050  | -1.83060 |
| F | -1.74680 | 3.17340  | 0.69030  |
| C | -3.55290 | -3.22050 | -0.26390 |
| C | -3.66300 | -2.46770 | 0.91210  |
| C | -3.54090 | -1.08350 | 0.89750  |
| C | -3.32120 | -2.53790 | -1.46460 |
| C | -3.19440 | -1.15440 | -1.49520 |
| C | -3.29830 | -0.34580 | -0.31210 |
| O | -3.18110 | 0.93250  | -0.33480 |
| H | -3.65090 | -4.30160 | -0.24610 |
| H | -3.84620 | -2.97460 | 1.85820  |
| H | -3.63440 | -0.51360 | 1.81990  |
| H | -3.23490 | -3.09980 | -2.39330 |
| H | -3.01680 | -0.63970 | -2.43760 |
| C | 5.10720  | -1.75980 | -0.42340 |
| C | 5.71990  | -0.51260 | -0.28720 |
| C | 4.93230  | 0.61860  | -0.09000 |
| C | 3.72220  | -1.87600 | -0.36190 |
| C | 2.94790  | -0.73430 | -0.16140 |
| C | 3.54140  | 0.51850  | -0.02670 |
| H | 5.70890  | -2.64910 | -0.57820 |
| H | 6.79970  | -0.42550 | -0.33530 |
| H | 5.39520  | 1.59400  | 0.01580  |
| H | 3.22990  | -2.83660 | -0.46350 |
| H | 2.94170  | 1.40790  | 0.12150  |
| F | 0.74110  | -0.18770 | 2.42660  |

32

5secondsubPRODpyrazine.xyz

|   |          |          |          |
|---|----------|----------|----------|
| N | -1.17310 | -0.71450 | -0.00020 |
| C | -0.01010 | -1.31180 | -0.00020 |
| C | 1.19900  | -0.60870 | -0.00010 |
| N | 1.17300  | 0.71460  | 0.00010  |
| C | 0.01010  | 1.31190  | 0.00020  |
| C | -1.19900 | 0.60880  | 0.00010  |

|   |          |          |          |
|---|----------|----------|----------|
| O | -2.35620 | 1.30880  | 0.00020  |
| F | 0.00140  | -2.65130 | -0.00050 |
| C | 6.05670  | 0.61430  | 0.00010  |
| C | 5.43190  | 0.30370  | 1.20770  |
| C | 4.18180  | -0.31380 | 1.21340  |
| C | 5.43200  | 0.30390  | -1.20770 |
| C | 4.18190  | -0.31370 | -1.21360 |
| C | 3.57510  | -0.61220 | -0.00010 |
| O | 2.35620  | -1.30880 | -0.00020 |
| H | 7.03000  | 1.09280  | 0.00020  |
| H | 5.91630  | 0.53960  | 2.14910  |
| H | 3.68400  | -0.56840 | 2.14220  |
| H | 5.91650  | 0.53980  | -2.14890 |
| H | 3.68420  | -0.56820 | -2.14240 |
| C | -5.43170 | -0.30450 | 1.20770  |
| C | -6.05670 | -0.61440 | -0.00000 |
| C | -5.43220 | -0.30310 | -1.20770 |
| C | -4.18160 | 0.31310  | 1.21360  |
| C | -3.57510 | 0.61220  | 0.00010  |
| C | -4.18210 | 0.31440  | -1.21340 |
| H | -5.91590 | -0.54100 | 2.14900  |
| H | -7.03000 | -1.09290 | -0.00010 |
| H | -5.91680 | -0.53850 | -2.14900 |
| H | -3.68360 | 0.56710  | 2.14240  |
| H | -3.68460 | 0.56950  | -2.14220 |
| F | -0.00140 | 2.65130  | 0.00040  |

33

5TSPyrazineSecondSub.xyz

|   |          |          |          |
|---|----------|----------|----------|
| N | 0.25000  | -1.75010 | -0.98780 |
| C | 1.51940  | -1.58940 | -1.08110 |
| C | 2.36490  | -1.21270 | 0.02770  |
| N | 1.81290  | -1.22920 | 1.24160  |
| C | 0.50070  | -1.36700 | 1.31270  |
| C | -0.31230 | -1.62770 | 0.23670  |
| O | -1.65860 | -1.89600 | 0.37830  |
| F | 2.10190  | -1.73690 | -2.29150 |
| F | 3.64800  | -1.68110 | -0.02810 |
| C | 0.36880  | 3.67740  | 0.37070  |
| C | 1.07850  | 3.05950  | 1.40270  |
| C | 1.92160  | 1.98200  | 1.14190  |
| C | 0.51410  | 3.19820  | -0.93410 |
| C | 1.34520  | 2.11410  | -1.20190 |
| C | 2.08070  | 1.48260  | -0.17190 |
| O | 2.90480  | 0.47710  | -0.44420 |

|   |          |          |          |
|---|----------|----------|----------|
| H | -0.27940 | 4.52300  | 0.57740  |
| H | 0.97820  | 3.42500  | 2.42130  |
| H | 2.48340  | 1.51300  | 1.94220  |
| H | -0.02790 | 3.67170  | -1.74830 |
| H | 1.46200  | 1.74180  | -2.21560 |
| C | -4.92180 | -0.38810 | -0.18130 |
| C | -4.59400 | 0.91600  | -0.55750 |
| C | -3.25360 | 1.28910  | -0.62610 |
| C | -3.92140 | -1.30660 | 0.12030  |
| C | -2.58130 | -0.91970 | 0.04910  |
| C | -2.23860 | 0.37910  | -0.32540 |
| H | -5.96120 | -0.69430 | -0.12270 |
| H | -5.37480 | 1.63080  | -0.79390 |
| H | -2.98360 | 2.29940  | -0.91600 |
| H | -4.15880 | -2.32320 | 0.41410  |
| H | -1.20100 | 0.68390  | -0.38570 |
| F | -0.03560 | -1.29150 | 2.55120  |

22

TFPyridazine4TS.xyz

|   |          |          |          |
|---|----------|----------|----------|
| N | 1.37644  | -0.56744 | 1.85405  |
| C | 1.47447  | -1.15580 | 0.70932  |
| C | 1.39842  | -0.54256 | -0.58000 |
| C | 1.41561  | 0.85075  | -0.48282 |
| C | 1.28983  | 1.42477  | 0.77280  |
| N | 1.27179  | 0.78405  | 1.91507  |
| F | 1.61051  | -2.49694 | 0.72401  |
| F | 2.03587  | -1.13716 | -1.61506 |
| F | 1.45393  | 1.60894  | -1.59967 |
| F | 1.20918  | 2.76628  | 0.84580  |
| C | -3.70859 | 0.46649  | 0.46054  |
| C | -2.92716 | 1.22740  | -0.41107 |
| C | -1.77744 | 0.69245  | -0.98809 |
| C | -3.32004 | -0.84544 | 0.74935  |
| C | -2.16955 | -1.38489 | 0.18399  |
| C | -1.37015 | -0.63730 | -0.71636 |
| H | -4.60567 | 0.88561  | 0.90502  |
| H | -3.21696 | 2.24841  | -0.64528 |
| H | -1.18003 | 1.28369  | -1.67527 |
| H | -3.91771 | -1.44918 | 1.42726  |
| H | -1.86510 | -2.40335 | 0.40879  |
| O | -0.29626 | -1.16585 | -1.27326 |

## 6secondsubPRODpyrazine.xyz

|   |          |          |          |
|---|----------|----------|----------|
| N | -3.56200 | -0.00130 | 0.00090  |
| C | -2.88640 | 1.11950  | 0.01580  |
| C | -1.48740 | 1.13820  | 0.01430  |
| N | -0.81470 | -0.00010 | -0.00120 |
| C | -1.48650 | -1.13900 | -0.01550 |
| C | -2.88550 | -1.12150 | -0.01500 |
| O | -0.86400 | -2.33760 | -0.03310 |
| F | -3.57550 | 2.26890  | 0.03280  |
| C | 3.29190  | 2.65570  | -0.04230 |
| C | 2.57760  | 2.57890  | -1.23790 |
| C | 1.19020  | 2.44250  | -1.22010 |
| C | 2.61720  | 2.59930  | 1.17700  |
| C | 1.22980  | 2.46250  | 1.20660  |
| C | 0.53770  | 2.38520  | 0.00490  |
| O | -0.86590 | 2.33740  | 0.03050  |
| H | 4.37090  | 2.76350  | -0.06100 |
| H | 3.09790  | 2.62690  | -2.18830 |
| H | 0.61830  | 2.38810  | -2.13930 |
| H | 3.16820  | 2.66310  | 2.10900  |
| H | 0.68760  | 2.42280  | 2.14430  |
| C | 2.61920  | -2.60830 | -1.17600 |
| C | 3.29380  | -2.65380 | 0.04380  |
| C | 2.57930  | -2.56680 | 1.23860  |
| C | 1.23170  | -2.47210 | -1.20690 |
| C | 0.53940  | -2.38460 | -0.00610 |
| C | 1.19180  | -2.43130 | 1.21940  |
| H | 3.17030  | -2.68000 | -2.10740 |
| H | 4.37280  | -2.76120 | 0.06350  |
| H | 3.09950  | -2.60640 | 2.18940  |
| H | 0.68950  | -2.44030 | -2.14500 |
| H | 0.61990  | -2.36920 | 2.13820  |
| F | -3.57350 | -2.27160 | -0.03110 |

33

## 6SecondSubSecondINTpyrazine.xyz

|   |          |          |          |
|---|----------|----------|----------|
| N | -1.06280 | -1.88720 | 1.47870  |
| C | -1.50400 | -1.78950 | 0.27940  |
| C | -0.86310 | -1.02540 | -0.80600 |
| N | 0.19570  | -0.26510 | -0.38750 |
| C | 0.65350  | -0.40690 | 0.85040  |
| C | 0.05430  | -1.21680 | 1.78410  |
| O | 1.72150  | 0.37880  | 1.25050  |
| F | -2.65300 | -2.45810 | -0.03520 |
| F | -0.43220 | -1.99660 | -1.84260 |

|   |          |          |          |
|---|----------|----------|----------|
| C | -3.64290 | 3.07550  | 0.00620  |
| C | -2.43660 | 3.20060  | -0.68400 |
| C | -1.81030 | 2.07520  | -1.21730 |
| C | -4.22520 | 1.81690  | 0.15490  |
| C | -3.60470 | 0.68720  | -0.37770 |
| C | -2.39520 | 0.81660  | -1.06390 |
| O | -1.80830 | -0.29340 | -1.63930 |
| H | -4.12780 | 3.95340  | 0.42030  |
| H | -1.97910 | 4.17720  | -0.80660 |
| H | -0.87140 | 2.15590  | -1.75110 |
| H | -5.16560 | 1.71140  | 0.68630  |
| H | -4.04820 | -0.29610 | -0.27080 |
| C | 4.50100  | -0.52980 | -1.00800 |
| C | 5.28920  | 0.61540  | -0.89310 |
| C | 4.85460  | 1.66560  | -0.08430 |
| C | 3.28970  | -0.63550 | -0.32660 |
| C | 2.86620  | 0.42190  | 0.48120  |
| C | 3.64490  | 1.57360  | 0.59970  |
| H | 4.82820  | -1.35370 | -1.63430 |
| H | 6.22980  | 0.68840  | -1.42830 |
| H | 5.45530  | 2.56420  | 0.01380  |
| H | 2.67780  | -1.52280 | -0.42940 |
| H | 3.29310  | 2.38170  | 1.23190  |
| F | 0.51310  | -1.33180 | 3.06740  |

33

6secondsubTSpyrazine.xyz

|   |          |          |          |
|---|----------|----------|----------|
| N | -1.24430 | -1.83780 | 1.40630  |
| C | -1.47910 | -2.04460 | 0.15740  |
| C | -0.76710 | -1.38310 | -0.90990 |
| N | 0.30930  | -0.67240 | -0.55980 |
| C | 0.53990  | -0.45090 | 0.73260  |
| C | -0.23160 | -1.02830 | 1.71600  |
| O | 1.55150  | 0.39910  | 1.11150  |
| F | -2.48750 | -2.88470 | -0.17530 |
| F | -0.60450 | -2.13860 | -2.05130 |
| C | -3.27570 | 2.98530  | 0.43980  |
| C | -2.15230 | 3.07040  | -0.38600 |
| C | -1.70950 | 1.95850  | -1.09810 |
| C | -3.95730 | 1.77010  | 0.53790  |
| C | -3.52090 | 0.65470  | -0.17230 |
| C | -2.38780 | 0.72330  | -1.01200 |
| O | -1.98290 | -0.33960 | -1.70880 |
| H | -3.61940 | 3.85440  | 0.99180  |
| H | -1.61620 | 4.01150  | -0.47410 |

|   |          |          |          |
|---|----------|----------|----------|
| H | -0.84050 | 2.02320  | -1.74490 |
| H | -4.83530 | 1.69130  | 1.17330  |
| H | -4.05250 | -0.28960 | -0.10400 |
| C | 4.60700  | -0.63440 | -0.69080 |
| C | 5.25960  | 0.59510  | -0.78390 |
| C | 4.64980  | 1.73620  | -0.26370 |
| C | 3.35530  | -0.73290 | -0.08590 |
| C | 2.75420  | 0.41770  | 0.42470  |
| C | 3.39530  | 1.65190  | 0.33700  |
| H | 5.07430  | -1.52940 | -1.08870 |
| H | 6.23400  | 0.66190  | -1.25560 |
| H | 5.14650  | 2.69870  | -0.32840 |
| H | 2.85300  | -1.68940 | -0.01530 |
| H | 2.90560  | 2.52940  | 0.74420  |
| F | 0.01070  | -0.82130 | 3.03730  |

33

SecondSub2FirstINTpyrimidine.xyz

|   |          |          |          |
|---|----------|----------|----------|
| C | 1.46470  | -2.07600 | -0.30740 |
| N | 1.38750  | -2.09390 | 1.00700  |
| C | 0.30050  | -1.53540 | 1.49560  |
| N | -0.72270 | -1.01370 | 0.85130  |
| C | -0.63130 | -1.01380 | -0.47150 |
| C | 0.48460  | -1.55040 | -1.12360 |
| O | -1.60430 | -0.51000 | -1.24260 |
| F | 0.18010  | -1.57860 | 2.81880  |
| C | 3.30200  | 2.77400  | -1.28000 |
| C | 2.04400  | 3.17840  | -0.81430 |
| C | 1.45010  | 2.57010  | 0.28500  |
| C | 3.95210  | 1.73590  | -0.59960 |
| C | 3.37300  | 1.11790  | 0.50170  |
| C | 2.08320  | 1.50170  | 1.01530  |
| O | 1.54520  | 0.94310  | 2.03120  |
| H | 1.51840  | 3.98560  | -1.32270 |
| H | 0.47390  | 2.90030  | 0.63630  |
| H | 4.93200  | 1.40390  | -0.93970 |
| H | 3.89580  | 0.31540  | 1.01890  |
| C | -4.95330 | -0.10420 | 0.23280  |
| C | -5.01380 | 1.28440  | 0.35330  |
| C | -3.92560 | 2.06590  | -0.03370 |
| C | -3.80760 | -0.71700 | -0.27260 |
| C | -2.73450 | 0.08100  | -0.64620 |
| C | -2.77280 | 1.46420  | -0.53730 |
| H | -5.79890 | -0.71490 | 0.52990  |
| H | -5.90860 | 1.75600  | 0.74450  |

|   |          |          |          |
|---|----------|----------|----------|
| H | -3.96940 | 3.14590  | 0.05530  |
| H | -3.74650 | -1.79390 | -0.37940 |
| H | -1.91510 | 2.05190  | -0.84370 |
| H | 3.76140  | 3.25410  | -2.13870 |
| F | 2.55240  | -2.61070 | -0.86060 |
| F | 0.58690  | -1.55660 | -2.46050 |

32

SecondSub2PRODpyrimidine.xyz

|   |          |          |          |
|---|----------|----------|----------|
| C | -0.73030 | 2.32150  | 0.01540  |
| N | -1.44660 | 1.21620  | -0.00100 |
| C | -0.74790 | 0.08790  | -0.01820 |
| N | 0.57790  | -0.03420 | -0.02110 |
| C | 1.27430  | 1.09010  | -0.00300 |
| C | 0.64710  | 2.34330  | 0.01580  |
| O | 2.61480  | 1.08310  | -0.00470 |
| C | -5.55930 | -1.34650 | -0.00430 |
| C | -4.87280 | -1.28720 | -1.21700 |
| C | -3.48330 | -1.17190 | -1.23280 |
| C | -4.85440 | -1.29480 | 1.19820  |
| C | -3.46500 | -1.17980 | 1.19380  |
| C | -2.80060 | -1.11710 | -0.02450 |
| O | -1.39740 | -1.09300 | -0.03600 |
| H | -5.41640 | -1.33230 | -2.15440 |
| H | -2.93260 | -1.13050 | -2.16560 |
| H | -5.38370 | -1.34590 | 2.14350  |
| H | -2.90050 | -1.14470 | 2.11860  |
| C | 4.33200  | -1.93550 | 1.21430  |
| C | 4.81200  | -2.46250 | 0.01520  |
| C | 4.53560  | -1.81740 | -1.18980 |
| C | 3.57290  | -0.76640 | 1.21460  |
| C | 3.30530  | -0.14440 | 0.00240  |
| C | 3.77570  | -0.64810 | -1.20230 |
| H | 4.54870  | -2.43200 | 2.15390  |
| H | 5.40410  | -3.37100 | 0.02070  |
| H | 4.91050  | -2.22120 | -2.12390 |
| H | 3.19730  | -0.33980 | 2.13750  |
| H | 3.55350  | -0.12930 | -2.12770 |
| H | -6.64000 | -1.43800 | 0.00360  |
| F | -1.39760 | 3.47550  | 0.03330  |
| F | 1.34800  | 3.48690  | 0.03430  |

33

SecondSub2SecondINTpyrimidine.xyz

|   |          |          |          |
|---|----------|----------|----------|
| C | 1.49430  | -2.03680 | -0.39300 |
| N | 1.70110  | -1.65510 | 0.82650  |
| C | 0.73790  | -0.79800 | 1.38590  |
| N | -0.43370 | -0.47180 | 0.68230  |
| C | -0.55520 | -0.91410 | -0.53680 |
| C | 0.40260  | -1.70870 | -1.17900 |
| O | -1.66840 | -0.61220 | -1.28010 |
| F | 0.34400  | -1.35160 | 2.64350  |
| C | 3.23640  | 2.96820  | -0.84190 |
| C | 1.91080  | 3.18750  | -0.46630 |
| C | 1.28200  | 2.32710  | 0.43310  |
| C | 3.93430  | 1.88640  | -0.30380 |
| C | 3.31200  | 1.02440  | 0.59800  |
| C | 1.98030  | 1.23990  | 0.96670  |
| O | 1.37840  | 0.42690  | 1.89890  |
| H | 1.36230  | 4.03090  | -0.87410 |
| H | 0.25320  | 2.48810  | 0.73270  |
| H | 4.96840  | 1.71260  | -0.58490 |
| H | 3.84080  | 0.17980  | 1.02210  |
| C | -4.87340 | -0.04160 | 0.41910  |
| C | -4.96050 | 1.34960  | 0.36450  |
| C | -3.92640 | 2.08640  | -0.21330 |
| C | -3.75640 | -0.69590 | -0.09820 |
| C | -2.73200 | 0.05130  | -0.67110 |
| C | -2.80610 | 1.43890  | -0.73320 |
| H | -5.67590 | -0.62110 | 0.86340  |
| H | -5.83160 | 1.85650  | 0.76580  |
| H | -3.98950 | 3.16850  | -0.26100 |
| H | -3.67590 | -1.77680 | -0.06880 |
| H | -1.99590 | 1.99680  | -1.18900 |
| H | 3.72410  | 3.63920  | -1.54150 |
| F | 2.44010  | -2.84170 | -0.94640 |
| F | 0.25830  | -2.14570 | -2.46840 |

33

SecondSub2TSPyrimidine.xyz

|   |          |          |          |
|---|----------|----------|----------|
| C | 1.55800  | -2.02800 | -0.33310 |
| N | 1.59820  | -1.87090 | 0.96130  |
| C | 0.59700  | -1.11540 | 1.47840  |
| N | -0.54270 | -0.79040 | 0.81440  |
| C | -0.53610 | -0.98220 | -0.48350 |
| C | 0.53510  | -1.58810 | -1.15160 |
| O | -1.60440 | -0.63790 | -1.24950 |
| F | 0.36180  | -1.39440 | 2.79100  |
| C | 3.29370  | 2.68240  | -1.07070 |



|   |          |          |          |
|---|----------|----------|----------|
| C | 2.00750  | 3.03470  | -0.65270 |
| C | 1.35790  | 2.30330  | 0.33770  |
| C | 3.92580  | 1.59270  | -0.46610 |
| C | 3.28650  | 0.86060  | 0.53080  |
| C | 1.97720  | 1.19150  | 0.95970  |
| O | 1.36360  | 0.51720  | 1.91950  |
| H | 1.50620  | 3.88650  | -1.10520 |
| H | 0.36060  | 2.57960  | 0.66710  |
| H | 4.93080  | 1.31390  | -0.77250 |
| H | 3.78330  | 0.02040  | 1.00440  |
| C | -4.90290 | -0.16130 | 0.30050  |
| C | -4.96780 | 1.23080  | 0.35890  |
| C | -3.89330 | 1.99580  | -0.09470 |
| C | -3.76680 | -0.79140 | -0.20590 |
| C | -2.70420 | -0.01390 | -0.65080 |
| C | -2.75330 | 1.37440  | -0.60280 |
| H | -5.73710 | -0.76110 | 0.64870  |
| H | -5.85390 | 1.71750  | 0.75200  |
| H | -3.93970 | 3.07890  | -0.05540 |
| H | -3.70160 | -1.87210 | -0.26210 |
| H | -1.91030 | 1.95270  | -0.96330 |
| H | 3.79850  | 3.25400  | -1.84310 |
| F | 2.57690  | -2.70710 | -0.89660 |
| F | 0.52980  | -1.79740 | -2.49280 |

32

SecondSub3PRODpyridazine.xyz

|   |          |          |          |
|---|----------|----------|----------|
| N | 0.89770  | 2.71590  | -0.30770 |
| N | 1.52000  | 1.52990  | -0.17460 |
| C | 0.82760  | 0.45940  | 0.13720  |
| C | -0.58200 | 0.45840  | 0.35710  |
| C | -1.18980 | 1.68680  | 0.24010  |
| C | -0.38230 | 2.78050  | -0.10920 |
| O | -1.17390 | -0.69390 | 0.72570  |
| C | 5.54790  | -1.20180 | -0.24090 |
| C | 5.03710  | -0.85520 | 1.01000  |
| C | 3.66650  | -0.66720 | 1.18200  |
| C | 4.68500  | -1.36570 | -1.32430 |
| C | 3.31240  | -1.17970 | -1.16380 |
| C | 2.82530  | -0.83060 | 0.08890  |
| O | 1.43520  | -0.73680 | 0.27520  |
| H | 6.61460  | -1.34910 | -0.36960 |
| H | 5.70400  | -0.73180 | 1.85640  |
| H | 3.25120  | -0.40340 | 2.14790  |
| H | 5.07710  | -1.64030 | -2.29750 |

|   |          |          |          |
|---|----------|----------|----------|
| H | 2.62580  | -1.30800 | -1.99270 |
| C | -4.53860 | -2.11490 | 0.74830  |
| C | -4.95040 | -1.90140 | -0.56710 |
| C | -4.09750 | -1.25920 | -1.46380 |
| C | -3.28400 | -1.68160 | 1.17240  |
| C | -2.45250 | -1.03860 | 0.26360  |
| C | -2.83660 | -0.82660 | -1.05580 |
| H | -5.19480 | -2.61600 | 1.45140  |
| H | -5.92870 | -2.23710 | -0.89270 |
| H | -4.40690 | -1.09680 | -2.49060 |
| H | -2.94550 | -1.83510 | 2.19040  |
| H | -2.16580 | -0.34320 | -1.75690 |
| F | -2.49550 | 1.85900  | 0.44560  |
| F | -0.96810 | 3.97560  | -0.23720 |

33

SecondSub3TSpyridazine.xyz

|   |          |          |          |
|---|----------|----------|----------|
| N | -1.29410 | 2.10940  | 1.04680  |
| N | -0.90450 | 1.07170  | 1.81500  |
| C | -0.18500 | 0.07370  | 1.26050  |
| C | 0.43520  | 0.26050  | -0.03500 |
| C | 0.02600  | 1.32750  | -0.77030 |
| C | -0.87910 | 2.22710  | -0.16920 |
| O | 1.29330  | -0.67980 | -0.54880 |
| F | 0.63920  | -0.54860 | 2.17160  |
| C | -4.78560 | -1.01340 | -0.97850 |
| C | -3.62930 | -1.42170 | -1.64780 |
| C | -2.42000 | -1.53390 | -0.96690 |
| C | -4.71510 | -0.72470 | 0.38630  |
| C | -3.50930 | -0.83740 | 1.07410  |
| C | -2.33230 | -1.25110 | 0.41380  |
| O | -1.18120 | -1.39210 | 1.07250  |
| H | -5.72790 | -0.92930 | -1.51050 |
| H | -3.67080 | -1.65330 | -2.70870 |
| H | -1.52050 | -1.85590 | -1.48300 |
| H | -5.60820 | -0.40930 | 0.91900  |
| H | -3.45170 | -0.62010 | 2.13550  |
| C | 4.82570  | -1.53250 | -0.71780 |
| C | 5.42460  | -0.49410 | -0.00190 |
| C | 4.62510  | 0.50530  | 0.54820  |
| C | 3.44480  | -1.57100 | -0.88270 |
| C | 2.65680  | -0.56220 | -0.32740 |
| C | 3.23860  | 0.47970  | 0.39140  |
| H | 5.43510  | -2.31840 | -1.15160 |
| H | 6.50120  | -0.46610 | 0.12520  |

|   |          |          |          |
|---|----------|----------|----------|
| H | 5.07680  | 1.31740  | 1.10850  |
| H | 2.96420  | -2.37040 | -1.43560 |
| H | 2.62520  | 1.25950  | 0.82570  |
| F | 0.49640  | 1.55800  | -2.00680 |
| F | -1.29740 | 3.29750  | -0.88780 |

33

SecondSub5FirstINTpyridazine.xyz

|   |          |          |          |
|---|----------|----------|----------|
| N | -1.28230 | -2.06750 | 1.26470  |
| C | -0.80990 | -2.12510 | 0.05730  |
| C | 0.10680  | -1.20960 | -0.48890 |
| C | 0.53540  | -0.19880 | 0.33810  |
| C | -0.01910 | -0.20800 | 1.63260  |
| N | -0.87120 | -1.07780 | 2.08930  |
| O | 1.34130  | 0.81370  | -0.08140 |
| F | -1.22390 | -3.13600 | -0.70890 |
| F | 0.62470  | -1.38990 | -1.69450 |
| C | -4.34370 | 2.22800  | 0.50260  |
| C | -3.04440 | 2.61170  | 0.15080  |
| C | -2.22920 | 1.78440  | -0.61400 |
| C | -4.80770 | 0.98170  | 0.06210  |
| C | -4.00410 | 0.14230  | -0.69830 |
| C | -2.66890 | 0.50130  | -1.08740 |
| O | -1.92580 | -0.27100 | -1.79550 |
| H | -4.97620 | 2.88010  | 1.09710  |
| H | -2.66150 | 3.57560  | 0.48160  |
| H | -1.22350 | 2.10040  | -0.88190 |
| H | -5.81470 | 0.66100  | 0.32330  |
| H | -4.37760 | -0.82380 | -1.03260 |
| C | 4.82670  | 1.67800  | -0.66550 |
| C | 5.49640  | 0.51040  | -0.29430 |
| C | 4.76500  | -0.58500 | 0.15710  |
| C | 3.43990  | 1.75020  | -0.58700 |
| C | 2.72450  | 0.64420  | -0.13240 |
| C | 3.37240  | -0.52850 | 0.24180  |
| H | 5.38470  | 2.53860  | -1.01860 |
| H | 6.57760  | 0.45710  | -0.35660 |
| H | 5.27340  | -1.49760 | 0.44930  |
| H | 2.90290  | 2.64830  | -0.86980 |
| H | 2.81510  | -1.38610 | 0.59930  |
| F | 0.36190  | 0.75710  | 2.47610  |

33

SecondSub5FirstINTpyrimidine.xyz

|   |          |          |          |
|---|----------|----------|----------|
| N | -1.12040 | -2.02360 | 0.65030  |
| C | -1.00600 | -1.93240 | -0.66070 |
| C | 0.05290  | -1.31360 | -1.29120 |
| C | 1.01740  | -0.74830 | -0.45920 |
| N | 0.91700  | -0.82240 | 0.86640  |
| C | -0.14260 | -1.45210 | 1.31940  |
| O | 2.03530  | -0.10270 | -1.04730 |
| F | -1.95410 | -2.50800 | -1.39110 |
| F | 0.13620  | -1.23350 | -2.62190 |
| C | -4.63290 | 2.38570  | 1.31570  |
| C | -3.39140 | 2.97200  | 1.03750  |
| C | -2.51800 | 2.41320  | 0.11250  |
| C | -4.97500 | 1.21490  | 0.62640  |
| C | -4.11350 | 0.64430  | -0.30200 |
| C | -2.82710 | 1.20990  | -0.61490 |
| O | -2.02590 | 0.68390  | -1.46310 |
| H | -5.31060 | 2.82710  | 2.04020  |
| H | -3.10060 | 3.88360  | 1.55790  |
| H | -1.55670 | 2.88330  | -0.08830 |
| H | -5.93480 | 0.73860  | 0.82210  |
| H | -4.39810 | -0.26560 | -0.82750 |
| C | 4.54890  | 2.07530  | 0.49610  |
| C | 5.44440  | 1.13730  | 1.00760  |
| C | 5.18460  | -0.22590 | 0.86010  |
| C | 3.39030  | 1.65740  | -0.15900 |
| C | 3.15160  | 0.29690  | -0.29350 |
| C | 4.03370  | -0.65550 | 0.20330  |
| H | 4.74770  | 3.13590  | 0.60520  |
| H | 6.34410  | 1.46620  | 1.51610  |
| H | 5.88060  | -0.95950 | 1.25220  |
| H | 2.68280  | 2.36970  | -0.56730 |
| H | 3.82560  | -1.71120 | 0.07300  |
| F | -0.24080 | -1.52590 | 2.64990  |

32

SecondSub5PRODpyridazine.xyz

|   |          |          |          |
|---|----------|----------|----------|
| N | 0.61700  | 3.04160  | -0.26630 |
| C | 1.19370  | 1.90250  | -0.51670 |
| C | 0.63670  | 0.62850  | -0.27350 |
| C | -0.63690 | 0.62880  | 0.27400  |
| C | -1.19370 | 1.90300  | 0.51660  |
| N | -0.61670 | 3.04190  | 0.26570  |
| O | -1.22500 | -0.53490 | 0.62270  |
| F | 2.41080  | 1.96260  | -1.06490 |
| C | 5.09380  | -1.57440 | 0.53610  |

|   |          |          |          |
|---|----------|----------|----------|
| C | 4.57140  | -1.98940 | -0.68930 |
| C | 3.28560  | -1.61380 | -1.07050 |
| C | 4.31950  | -0.78690 | 1.38600  |
| C | 3.02720  | -0.40940 | 1.02170  |
| C | 2.53160  | -0.82490 | -0.20920 |
| O | 1.22450  | -0.53550 | -0.62160 |
| H | 6.09660  | -1.86610 | 0.82770  |
| H | 5.16620  | -2.60380 | -1.35640 |
| H | 2.86310  | -1.92130 | -2.02000 |
| H | 4.71430  | -0.46640 | 2.34400  |
| H | 2.41890  | 0.18560  | 1.69350  |
| C | -4.57130 | -1.99010 | 0.68870  |
| C | -5.09350 | -1.57490 | -0.53680 |
| C | -4.31920 | -0.78670 | -1.38620 |
| C | -3.28580 | -1.61420 | 1.07040  |
| C | -2.53180 | -0.82460 | 0.20960  |
| C | -3.02720 | -0.40880 | -1.02120 |
| H | -5.16610 | -2.60500 | 1.35530  |
| H | -6.09610 | -1.86690 | -0.82880 |
| H | -4.71380 | -0.46600 | -2.34410 |
| H | -2.86350 | -1.92180 | 2.01990  |
| H | -2.41890 | 0.18670  | -1.69260 |
| F | -2.41080 | 1.96360  | 1.06470  |

32

SecondSub5PRODpyrimidine.xyz

|   |          |          |          |
|---|----------|----------|----------|
| N | 0.21370  | 3.27010  | 0.28660  |
| C | 1.09080  | 2.42550  | -0.22510 |
| C | 0.81660  | 1.10430  | -0.53700 |
| C | -0.50120 | 0.69610  | -0.25900 |
| N | -1.40100 | 1.52660  | 0.25960  |
| C | -0.97600 | 2.74920  | 0.49170  |
| O | -0.81600 | -0.57110 | -0.53980 |
| F | 2.31080  | 2.90200  | -0.45370 |
| C | 4.03890  | -2.50370 | 0.88800  |
| C | 3.21440  | -1.65070 | 1.61690  |
| C | 2.42160  | -0.69950 | 0.97150  |
| C | 4.07120  | -2.40360 | -0.50430 |
| C | 3.28570  | -1.46260 | -1.16190 |
| C | 2.46550  | -0.61690 | -0.41700 |
| O | 1.72610  | 0.30040  | -1.16110 |
| H | 4.65160  | -3.23910 | 1.39750  |
| H | 3.18160  | -1.71680 | 2.69910  |
| H | 1.78990  | -0.03700 | 1.55110  |
| H | 4.70990  | -3.06160 | -1.08400 |

|   |          |          |          |
|---|----------|----------|----------|
| H | 3.29680  | -1.37130 | -2.24210 |
| C | -3.64810 | -2.21090 | 1.13790  |
| C | -4.62130 | -2.13680 | 0.14160  |
| C | -4.33070 | -1.51590 | -1.07310 |
| C | -2.38340 | -1.66290 | 0.92690  |
| C | -2.11980 | -1.04600 | -0.28800 |
| C | -3.06990 | -0.96420 | -1.29640 |
| H | -3.86910 | -2.69700 | 2.08180  |
| H | -5.60280 | -2.56620 | 0.30970  |
| H | -5.08360 | -1.46060 | -1.85160 |
| H | -1.61160 | -1.71650 | 1.68600  |
| H | -2.82280 | -0.48370 | -2.23600 |
| F | -1.88140 | 3.57910  | 1.00870  |

33

SecondSub5SecondINTpyrimidine.xyz

|   |          |          |          |
|---|----------|----------|----------|
| N | -1.08070 | -2.36400 | 0.77610  |
| C | -1.13790 | -1.80890 | -0.40460 |
| C | -0.41570 | -0.64990 | -0.87240 |
| C | 0.43030  | -0.20660 | 0.21280  |
| N | 0.49670  | -0.74930 | 1.41910  |
| C | -0.26090 | -1.79370 | 1.63750  |
| O | 1.20740  | 0.92030  | -0.03460 |
| F | -1.97230 | -2.39740 | -1.31250 |
| F | 0.38180  | -0.96900 | -2.09800 |
| C | -4.21430 | 2.24600  | 0.72500  |
| C | -2.94460 | 2.81660  | 0.63110  |
| C | -1.94320 | 2.18880  | -0.10860 |
| C | -4.47970 | 1.04410  | 0.06850  |
| C | -3.48360 | 0.41260  | -0.67520 |
| C | -2.21220 | 0.98670  | -0.76840 |
| O | -1.23900 | 0.39740  | -1.54500 |
| H | -4.99160 | 2.73560  | 1.30250  |
| H | -2.73010 | 3.75220  | 1.13800  |
| H | -0.95080 | 2.61830  | -0.18480 |
| H | -5.46550 | 0.59450  | 0.13400  |
| H | -3.68090 | -0.52020 | -1.19070 |
| C | 4.69930  | 1.93850  | 0.17800  |
| C | 5.37540  | 0.73460  | -0.02330 |
| C | 4.64120  | -0.43270 | -0.23140 |
| C | 3.30710  | 1.97430  | 0.18350  |
| C | 2.58140  | 0.79920  | -0.02250 |
| C | 3.24740  | -0.40950 | -0.23540 |
| H | 5.25590  | 2.85620  | 0.33920  |
| H | 6.45970  | 0.70710  | -0.02030 |

|   |          |          |          |
|---|----------|----------|----------|
| H | 5.15410  | -1.37480 | -0.39750 |
| H | 2.76990  | 2.90240  | 0.34670  |
| H | 2.68120  | -1.31470 | -0.41440 |
| F | -0.20610 | -2.35090 | 2.88080  |

33

SecondSub5TSpyridazine.xyz

|   |          |          |          |
|---|----------|----------|----------|
| N | -1.24560 | -2.13560 | 1.36460  |
| C | -0.94550 | -2.11890 | 0.11100  |
| C | -0.18930 | -1.11550 | -0.57110 |
| C | 0.40970  | -0.20710 | 0.31040  |
| C | 0.02780  | -0.28070 | 1.64810  |
| N | -0.75460 | -1.17630 | 2.19380  |
| O | 1.21540  | 0.80600  | -0.16000 |
| F | -1.43280 | -3.12360 | -0.64480 |
| F | 0.47760  | -1.46650 | -1.69470 |
| C | -4.34760 | 2.06940  | 0.36410  |
| C | -3.04330 | 2.53380  | 0.18110  |
| C | -2.09790 | 1.75970  | -0.48780 |
| C | -4.69420 | 0.80970  | -0.13440 |
| C | -3.75480 | 0.02630  | -0.79630 |
| C | -2.42920 | 0.48320  | -1.00770 |
| O | -1.55180 | -0.25420 | -1.66070 |
| H | -5.08190 | 2.67800  | 0.88240  |
| H | -2.75990 | 3.51140  | 0.56270  |
| H | -1.08810 | 2.12860  | -0.63710 |
| H | -5.70520 | 0.43430  | 0.00140  |
| H | -4.02200 | -0.95330 | -1.18310 |
| C | 4.72170  | 1.66630  | -0.61280 |
| C | 5.37350  | 0.48130  | -0.26540 |
| C | 4.61980  | -0.62220 | 0.12730  |
| C | 3.33370  | 1.74800  | -0.56610 |
| C | 2.59130  | 0.63480  | -0.16990 |
| C | 3.22650  | -0.55570 | 0.17670  |
| H | 5.29540  | 2.53410  | -0.92090 |
| H | 6.45570  | 0.42070  | -0.30140 |
| H | 5.11290  | -1.55020 | 0.39780  |
| H | 2.81340  | 2.66170  | -0.83090 |
| H | 2.64800  | -1.42030 | 0.47820  |
| F | 0.53420  | 0.64010  | 2.49110  |

33

SecondSub6FirstINTpyrimidine.xyz

|   |          |          |         |
|---|----------|----------|---------|
| C | -0.58740 | -1.24180 | 1.76780 |
|---|----------|----------|---------|

|   |          |          |          |
|---|----------|----------|----------|
| N | -1.69030 | -1.80850 | 1.33210  |
| C | -1.71650 | -2.02070 | 0.02860  |
| C | -0.66540 | -1.69860 | -0.80860 |
| C | 0.44940  | -1.11570 | -0.20870 |
| N | 0.48980  | -0.88940 | 1.10350  |
| O | 1.48980  | -0.81620 | -1.00150 |
| F | -2.76830 | -2.66360 | -0.45950 |
| C | -1.22780 | 3.72380  | 0.02370  |
| C | -0.87730 | 2.97520  | -1.10740 |
| C | -1.50590 | 1.77040  | -1.40040 |
| C | -2.23900 | 3.22540  | 0.85620  |
| C | -2.87830 | 2.02460  | 0.57610  |
| C | -2.55250 | 1.22610  | -0.57630 |
| O | -3.13890 | 0.12050  | -0.84200 |
| H | -0.09740 | 3.34240  | -1.77270 |
| H | -1.22120 | 1.20240  | -2.28390 |
| H | -2.53010 | 3.78850  | 1.74160  |
| H | -3.66340 | 1.65240  | 1.23200  |
| C | 4.97320  | -0.30220 | 0.02200  |
| C | 4.95560  | 1.04430  | 0.38240  |
| C | 3.76560  | 1.76970  | 0.30830  |
| C | 3.80310  | -0.92890 | -0.40720 |
| C | 2.63060  | -0.18830 | -0.47120 |
| C | 2.59090  | 1.15660  | -0.12360 |
| H | 5.89590  | -0.86990 | 0.07370  |
| H | 5.86660  | 1.52930  | 0.71560  |
| H | 3.74900  | 2.81860  | 0.58400  |
| H | 3.79490  | -1.97360 | -0.69620 |
| H | 1.66060  | 1.70890  | -0.19430 |
| H | -0.73520 | 4.66560  | 0.24520  |
| F | -0.71620 | -1.92050 | -2.12910 |
| F | -0.55010 | -1.00260 | 3.08310  |

32

SecondSub6PRODpyridazine.xyz

|   |          |          |          |
|---|----------|----------|----------|
| N | 0.27360  | -1.47860 | 1.12870  |
| N | 1.36850  | -0.85320 | 0.66060  |
| C | 1.25430  | 0.34890  | 0.14130  |
| C | 0.01610  | 1.02170  | 0.04210  |
| C | -1.11030 | 0.39430  | 0.51540  |
| C | -0.88000 | -0.88950 | 1.06480  |
| O | -2.29890 | 1.03700  | 0.52520  |
| C | 6.14590  | -0.66630 | -0.31430 |
| C | 5.29120  | -0.89250 | -1.39310 |
| C | 4.00240  | -0.36070 | -1.39200 |



|   |          |          |          |
|---|----------|----------|----------|
| C | 5.71320  | 0.09780  | 0.76930  |
| C | 4.42620  | 0.63420  | 0.78150  |
| C | 3.59060  | 0.39310  | -0.30080 |
| O | 2.32700  | 1.01080  | -0.33510 |
| H | 5.62560  | -1.48170 | -2.24010 |
| H | 3.32650  | -0.52070 | -2.22420 |
| H | 6.37650  | 0.28040  | 1.60770  |
| H | 4.07370  | 1.23490  | 1.61210  |
| C | -5.83380 | 0.26960  | 0.05090  |
| C | -5.79710 | -0.63390 | -1.01180 |
| C | -4.57170 | -0.99940 | -1.56560 |
| C | -4.65350 | 0.80020  | 0.56540  |
| C | -3.44150 | 0.41940  | 0.00030  |
| C | -3.38160 | -0.47020 | -1.06640 |
| H | -6.78300 | 0.56100  | 0.48720  |
| H | -6.71810 | -1.04770 | -1.40720 |
| H | -4.53390 | -1.69510 | -2.39680 |
| H | -4.65940 | 1.49930  | 1.39350  |
| H | -2.43100 | -0.74010 | -1.51240 |
| H | 7.14850  | -1.07990 | -0.32050 |
| F | -0.04720 | 2.23740  | -0.49470 |
| F | -1.92720 | -1.55630 | 1.56500  |

32

SecondSub6PRODpyrimidine.xyz

|   |          |          |          |
|---|----------|----------|----------|
| C | 0.00000  | -1.40640 | -0.00060 |
| N | -1.18900 | -0.84870 | -0.00040 |
| C | -1.18840 | 0.48440  | 0.00010  |
| C | 0.00000  | 1.20940  | 0.00040  |
| C | 1.18840  | 0.48440  | 0.00010  |
| N | 1.18900  | -0.84870 | -0.00040 |
| O | 2.33580  | 1.17810  | 0.00040  |
| C | -6.06280 | -0.69370 | -0.00020 |
| C | -5.43350 | -0.39360 | 1.20780  |
| C | -4.17430 | 0.20530  | 1.21420  |
| C | -5.43400 | -0.39180 | -1.20790 |
| C | -4.17490 | 0.20700  | -1.21400 |
| C | -3.56550 | 0.49280  | 0.00020  |
| O | -2.33580 | 1.17810  | 0.00040  |
| H | -5.92100 | -0.62310 | 2.14890  |
| H | -3.67240 | 0.45170  | 2.14280  |
| H | -5.92190 | -0.62000 | -2.14920 |
| H | -3.67320 | 0.45480  | -2.14240 |
| C | 5.43400  | -0.39180 | -1.20790 |
| C | 6.06280  | -0.69370 | -0.00020 |

|   |          |          |          |
|---|----------|----------|----------|
| C | 5.43350  | -0.39360 | 1.20780  |
| C | 4.17490  | 0.20700  | -1.21400 |
| C | 3.56550  | 0.49280  | 0.00020  |
| C | 4.17430  | 0.20530  | 1.21420  |
| H | 5.92190  | -0.62000 | -2.14920 |
| H | 7.04310  | -1.15750 | -0.00030 |
| H | 5.92100  | -0.62310 | 2.14890  |
| H | 3.67320  | 0.45480  | -2.14240 |
| H | 3.67240  | 0.45170  | 2.14280  |
| H | -7.04310 | -1.15750 | -0.00030 |
| F | -0.00000 | 2.55210  | 0.00100  |
| F | 0.00000  | -2.74350 | -0.00120 |

33

SecondSub6SecondINTpyrimidine.xyz

|   |          |          |          |
|---|----------|----------|----------|
| C | -0.62820 | -1.13120 | 1.74330  |
| N | -1.82840 | -1.28400 | 1.26890  |
| C | -1.96040 | -1.33970 | -0.11880 |
| C | -0.68310 | -1.37990 | -0.83730 |
| C | 0.48050  | -1.17150 | -0.17580 |
| N | 0.55330  | -1.04720 | 1.17270  |
| O | 1.65190  | -1.14440 | -0.89710 |
| F | -2.77040 | -2.45520 | -0.47690 |
| C | -1.50070 | 3.64360  | -0.11070 |
| C | -1.07910 | 2.89660  | -1.21110 |
| C | -1.52250 | 1.58620  | -1.38390 |
| C | -2.37690 | 3.07460  | 0.81400  |
| C | -2.81910 | 1.76240  | 0.64970  |
| C | -2.39050 | 1.01460  | -0.44900 |
| O | -2.85090 | -0.27250 | -0.62410 |
| H | -0.40330 | 3.33360  | -1.93940 |
| H | -1.20080 | 0.99720  | -2.23480 |
| H | -2.71350 | 3.65070  | 1.67010  |
| H | -3.49060 | 1.30290  | 1.36540  |
| C | 5.08790  | -0.25420 | -0.03590 |
| C | 4.95700  | 1.08610  | 0.32430  |
| C | 3.69720  | 1.68700  | 0.29530  |
| C | 3.96750  | -0.99380 | -0.41250 |
| C | 2.71630  | -0.38450 | -0.43450 |
| C | 2.57230  | 0.95870  | -0.08610 |
| H | 6.06220  | -0.73160 | -0.01890 |
| H | 5.82820  | 1.65970  | 0.62200  |
| H | 3.58690  | 2.73130  | 0.56890  |
| H | 4.05000  | -2.03860 | -0.69060 |
| H | 1.59370  | 1.42390  | -0.11370 |

|   |          |          |          |
|---|----------|----------|----------|
| H | -1.15460 | 4.66340  | 0.02140  |
| F | -0.72820 | -1.47420 | -2.20380 |
| F | -0.57740 | -1.04370 | 3.10410  |

33

SecondSub6TSpYridazine.xyz

|   |          |          |          |
|---|----------|----------|----------|
| N | 1.08090  | -1.32100 | -1.96130 |
| N | 2.12030  | -1.58120 | -1.13260 |
| C | 1.91260  | -1.64890 | 0.19520  |
| C | 0.55860  | -1.69580 | 0.69600  |
| C | -0.48060 | -1.46320 | -0.14650 |
| C | -0.12180 | -1.26230 | -1.50770 |
| O | -1.78100 | -1.55990 | 0.27560  |
| F | 2.75190  | -2.55490 | 0.82000  |
| C | 1.89170  | 3.55530  | -0.34740 |
| C | 1.27180  | 3.09160  | 0.81550  |
| C | 1.50330  | 1.79580  | 1.27100  |
| C | 2.75720  | 2.70650  | -1.04050 |
| C | 3.00390  | 1.41360  | -0.58390 |
| C | 2.38260  | 0.92950  | 0.58700  |
| O | 2.63110  | -0.29460 | 1.06070  |
| H | 0.59990  | 3.74220  | 1.36840  |
| H | 1.02470  | 1.43170  | 2.17520  |
| H | 3.24990  | 3.05710  | -1.94320 |
| H | 3.68480  | 0.75800  | -1.11400 |
| C | -4.87550 | 0.35710  | 0.26020  |
| C | -4.41410 | 1.67110  | 0.16410  |
| C | -3.04360 | 1.91270  | 0.09600  |
| C | -3.97690 | -0.70540 | 0.28120  |
| C | -2.60890 | -0.44650 | 0.21010  |
| C | -2.13030 | 0.85790  | 0.12090  |
| H | -5.94000 | 0.15510  | 0.31470  |
| H | -5.11660 | 2.49710  | 0.14460  |
| H | -2.67210 | 2.92970  | 0.02670  |
| H | -4.31730 | -1.73250 | 0.35100  |
| H | -1.06510 | 1.05550  | 0.08610  |
| H | 1.71010  | 4.56480  | -0.70200 |
| F | 0.35360  | -1.94120 | 2.00160  |
| F | -1.12180 | -1.02830 | -2.39570 |

33

SecondSum5SecondINTpyridazine.xyz

|   |          |          |         |
|---|----------|----------|---------|
| N | -1.19930 | -2.15780 | 1.43920 |
| C | -1.11520 | -1.96820 | 0.17500 |

|   |          |          |          |
|---|----------|----------|----------|
| C | -0.37930 | -0.93360 | -0.57300 |
| C | 0.36270  | -0.15870 | 0.40180  |
| C | 0.20400  | -0.41980 | 1.74220  |
| N | -0.52860 | -1.35710 | 2.31420  |
| O | 1.13840  | 0.90740  | -0.04860 |
| F | -1.82690 | -2.82710 | -0.61670 |
| F | 0.48140  | -1.54550 | -1.55460 |
| C | -4.38230 | 2.06370  | 0.02540  |
| C | -3.09860 | 2.60890  | -0.01570 |
| C | -2.03020 | 1.86060  | -0.50820 |
| C | -4.59530 | 0.76340  | -0.43220 |
| C | -3.53140 | 0.00860  | -0.92450 |
| C | -2.24950 | 0.55990  | -0.96550 |
| O | -1.21240 | -0.17220 | -1.51230 |
| H | -5.21140 | 2.64950  | 0.40830  |
| H | -2.92620 | 3.62090  | 0.33670  |
| H | -1.02770 | 2.27060  | -0.54400 |
| H | -5.59110 | 0.33270  | -0.40530 |
| H | -3.68060 | -1.00450 | -1.28030 |
| C | 4.60920  | 1.82540  | -0.64480 |
| C | 5.28820  | 0.63040  | -0.39930 |
| C | 4.56150  | -0.50140 | -0.03480 |
| C | 3.22440  | 1.88900  | -0.52220 |
| C | 2.50590  | 0.74880  | -0.15310 |
| C | 3.17290  | -0.45230 | 0.08930  |
| H | 5.15920  | 2.71610  | -0.93100 |
| H | 6.36790  | 0.58350  | -0.49210 |
| H | 5.07470  | -1.43880 | 0.15550  |
| H | 2.68620  | 2.81280  | -0.70550 |
| H | 2.61280  | -1.33760 | 0.36110  |
| F | 0.88890  | 0.36560  | 2.61350  |

33

SecondSum6FirstINTpyridazine.xyz

|   |          |          |          |
|---|----------|----------|----------|
| N | 0.92760  | -1.45020 | -2.04100 |
| N | 1.96080  | -1.91360 | -1.30940 |
| C | 1.78040  | -2.12870 | -0.03870 |
| C | 0.56740  | -1.92460 | 0.63580  |
| C | -0.50790 | -1.48560 | -0.10160 |
| C | -0.22340 | -1.26430 | -1.47010 |
| O | -1.73290 | -1.41630 | 0.46650  |
| F | 2.79990  | -2.64920 | 0.63850  |
| C | 1.81900  | 3.80890  | -0.47250 |
| C | 1.10530  | 3.43670  | 0.67320  |
| C | 1.32000  | 2.20960  | 1.29080  |

|   |          |          |          |
|---|----------|----------|----------|
| C | 2.76970  | 2.91140  | -0.97610 |
| C | 2.99930  | 1.68370  | -0.36790 |
| C | 2.28320  | 1.25800  | 0.80530  |
| O | 2.48330  | 0.12570  | 1.37010  |
| H | 0.36560  | 4.11830  | 1.09010  |
| H | 0.75920  | 1.93840  | 2.18340  |
| H | 3.34150  | 3.17890  | -1.86350 |
| H | 3.74720  | 1.00420  | -0.77120 |
| C | -4.82800 | 0.48690  | 0.15840  |
| C | -4.35700 | 1.79520  | 0.04280  |
| C | -2.98430 | 2.03790  | 0.05000  |
| C | -3.93360 | -0.57450 | 0.27240  |
| C | -2.56840 | -0.30900 | 0.27470  |
| C | -2.07550 | 0.98630  | 0.17100  |
| H | -5.89420 | 0.28770  | 0.15600  |
| H | -5.05540 | 2.61980  | -0.04810 |
| H | -2.60880 | 3.05240  | -0.03050 |
| H | -4.27750 | -1.59860 | 0.36030  |
| H | -1.00900 | 1.18410  | 0.20700  |
| H | 1.64650  | 4.76770  | -0.95180 |
| F | 0.45040  | -2.20190 | 1.92800  |
| F | -1.21810 | -0.83900 | -2.25930 |

33

SecondSum6SecondINTpyridazine.xyz

|   |          |          |          |
|---|----------|----------|----------|
| N | 0.99810  | -1.37400 | -2.02000 |
| N | 2.05680  | -1.30500 | -1.19030 |
| C | 1.87980  | -1.34210 | 0.18160  |
| C | 0.49650  | -1.36780 | 0.66330  |
| C | -0.54740 | -1.41300 | -0.19800 |
| C | -0.20940 | -1.42200 | -1.57630 |
| O | -1.84860 | -1.52070 | 0.23840  |
| F | 2.56680  | -2.51440 | 0.75380  |
| C | 1.98920  | 3.68670  | -0.02000 |
| C | 1.37410  | 3.09430  | 1.08300  |
| C | 1.59090  | 1.74630  | 1.36840  |
| C | 2.82910  | 2.92440  | -0.83270 |
| C | 3.05140  | 1.57720  | -0.55170 |
| C | 2.43120  | 0.98550  | 0.55190  |
| O | 2.68600  | -0.32920 | 0.87910  |
| H | 0.72280  | 3.68030  | 1.72380  |
| H | 1.11850  | 1.27380  | 2.22260  |
| H | 3.31450  | 3.37960  | -1.69040 |
| H | 3.69580  | 0.97100  | -1.17500 |
| C | -4.92550 | 0.41840  | 0.36000  |

|   |          |          |          |
|---|----------|----------|----------|
| C | -4.46900 | 1.72230  | 0.15740  |
| C | -3.10740 | 1.94790  | -0.03120 |
| C | -4.03220 | -0.64820 | 0.37080  |
| C | -2.67100 | -0.40720 | 0.18070  |
| C | -2.19890 | 0.88840  | -0.02020 |
| H | -5.98340 | 0.22760  | 0.50780  |
| H | -5.16790 | 2.55160  | 0.14790  |
| H | -2.73830 | 2.95640  | -0.18620 |
| H | -4.37030 | -1.66680 | 0.52490  |
| H | -1.14010 | 1.07480  | -0.15440 |
| H | 1.82020  | 4.73550  | -0.24110 |
| F | 0.28550  | -1.33670 | 2.00130  |
| F | -1.22860 | -1.46110 | -2.48450 |

33

SecondSub3SecondINTpyridazine.xyz

|   |          |          |          |
|---|----------|----------|----------|
| N | -1.31090 | 2.17660  | 1.01980  |
| N | -1.16600 | 1.03830  | 1.71030  |
| C | -0.38390 | 0.00330  | 1.20650  |
| C | 0.34860  | 0.26090  | -0.04470 |
| C | 0.13750  | 1.42780  | -0.70070 |
| C | -0.73080 | 2.37160  | -0.11660 |
| O | 1.16590  | -0.72520 | -0.56470 |
| F | 0.58150  | -0.40660 | 2.21110  |
| C | -4.67430 | -1.40620 | -1.03540 |
| C | -3.46320 | -1.74810 | -1.63750 |
| C | -2.27410 | -1.68590 | -0.91130 |
| C | -4.69020 | -1.00590 | 0.30120  |
| C | -3.50500 | -0.94180 | 1.03190  |
| C | -2.29180 | -1.28440 | 0.42750  |
| O | -1.12670 | -1.28110 | 1.15900  |
| H | -5.59870 | -1.45600 | -1.60160 |
| H | -3.44160 | -2.06390 | -2.67580 |
| H | -1.32700 | -1.95170 | -1.36800 |
| H | -5.62870 | -0.74040 | 0.77790  |
| H | -3.50130 | -0.62850 | 2.06820  |
| C | 4.67560  | -1.63780 | -0.87820 |
| C | 5.31600  | -0.65090 | -0.12670 |
| C | 4.55150  | 0.33280  | 0.49740  |
| C | 3.28990  | -1.63890 | -1.00790 |
| C | 2.53530  | -0.64650 | -0.37930 |
| C | 3.16160  | 0.34280  | 0.37790  |
| H | 5.25610  | -2.41190 | -1.36950 |
| H | 6.39620  | -0.65080 | -0.02840 |
| H | 5.03480  | 1.10390  | 1.08880  |

|   |          |          |          |
|---|----------|----------|----------|
| H | 2.77960  | -2.39820 | -1.59030 |
| H | 2.57390  | 1.10090  | 0.87890  |
| F | 0.76370  | 1.70460  | -1.86290 |
| F | -0.95250 | 3.55140  | -0.76600 |

33

SecondSub5TSpyrimidine.xyz

|   |          |          |          |
|---|----------|----------|----------|
| N | -1.12890 | -2.31710 | 0.72330  |
| C | -1.07940 | -1.88390 | -0.51080 |
| C | -0.37030 | -0.73890 | -0.98720 |
| C | 0.46510  | -0.24660 | 0.06520  |
| N | 0.42640  | -0.65950 | 1.32550  |
| C | -0.37400 | -1.66300 | 1.58360  |
| O | 1.28800  | 0.81910  | -0.25180 |
| F | -1.81310 | -2.56870 | -1.42670 |
| F | 0.27400  | -0.91280 | -2.22720 |
| C | -4.25110 | 2.02390  | 0.96520  |
| C | -3.02240 | 2.66340  | 0.78790  |
| C | -2.06220 | 2.12450  | -0.06540 |
| C | -4.51040 | 0.83830  | 0.27530  |
| C | -3.55500 | 0.29620  | -0.58200 |
| C | -2.31790 | 0.93770  | -0.77590 |
| O | -1.40410 | 0.43690  | -1.62870 |
| H | -4.99760 | 2.44550  | 1.63060  |
| H | -2.80930 | 3.58520  | 1.32140  |
| H | -1.10420 | 2.61450  | -0.20640 |
| H | -5.46230 | 0.33180  | 0.40630  |
| H | -3.75330 | -0.62240 | -1.12490 |
| C | 4.76080  | 1.82850  | 0.18570  |
| C | 5.43340  | 0.60670  | 0.14380  |
| C | 4.70340  | -0.56990 | -0.02140 |
| C | 3.37360  | 1.87430  | 0.07200  |
| C | 2.65360  | 0.69040  | -0.09240 |
| C | 3.31490  | -0.53740 | -0.14190 |
| H | 5.31540  | 2.75240  | 0.31310  |
| H | 6.51350  | 0.57230  | 0.23720  |
| H | 5.21520  | -1.52610 | -0.06200 |
| H | 2.83710  | 2.81610  | 0.10670  |
| H | 2.75250  | -1.45270 | -0.28110 |
| F | -0.42010 | -2.09560 | 2.87070  |

10

Tetrafluoropyridizine.xyz

|   |          |         |         |
|---|----------|---------|---------|
| C | -0.98089 | 0.02269 | 0.00000 |
|---|----------|---------|---------|

|   |          |          |         |
|---|----------|----------|---------|
| C | -0.54510 | -1.31314 | 0.00000 |
| N | 0.70379  | -1.68036 | 0.00000 |
| N | 1.66371  | -0.74249 | 0.00000 |
| C | 1.32542  | 0.51455  | 0.00000 |
| C | 0.00000  | 0.98105  | 0.00000 |
| F | 2.30495  | 1.41339  | 0.00000 |
| F | -0.27864 | 2.27469  | 0.00000 |
| F | -2.26774 | 0.33130  | 0.00000 |
| F | -1.46624 | -2.27172 | 0.00000 |

22

TFP2subPhenoxy.xyz

|   |          |          |          |
|---|----------|----------|----------|
| C | 1.43420  | -0.50830 | -1.16490 |
| N | 1.40960  | 0.79320  | -1.19850 |
| C | 1.25910  | 1.40200  | 0.00020  |
| N | 1.40920  | 0.79300  | 1.19880  |
| C | 1.43380  | -0.50860 | 1.16500  |
| C | 1.42870  | -1.26440 | -0.00010 |
| F | 1.51410  | -1.15380 | 2.33940  |
| F | 1.47180  | -2.61490 | -0.00020 |
| F | 1.51500  | -1.15330 | -2.33950 |
| F | 1.68110  | 2.68510  | 0.00040  |
| C | -3.47790 | -1.00850 | -0.00010 |
| C | -2.98570 | -0.49600 | 1.20360  |
| C | -2.01400 | 0.50030  | 1.20840  |
| C | -2.98590 | -0.49580 | -1.20390 |
| C | -2.01410 | 0.50050  | -1.20860 |
| C | -1.49340 | 1.03140  | -0.00010 |
| H | -4.23830 | -1.78310 | -0.00020 |
| H | -3.36480 | -0.87850 | 2.14810  |
| H | -1.63520 | 0.90020  | 2.14440  |
| H | -3.36510 | -0.87810 | -2.14840 |
| H | -1.63550 | 0.90050  | -2.14460 |
| O | -0.57980 | 1.98150  | -0.00000 |

22

TFP2subPhenoxy2ndInt.xyz

|   |         |          |          |
|---|---------|----------|----------|
| C | 1.44890 | -0.56370 | -1.16270 |
| N | 0.96820 | 0.63320  | -1.22390 |
| C | 0.72650 | 1.28980  | 0.00020  |
| N | 0.96800 | 0.63290  | 1.22420  |
| C | 1.44870 | -0.56400 | 1.16280  |
| C | 1.74030 | -1.26860 | -0.00000 |
| F | 1.67860 | -1.19390 | 2.34220  |



|   |          |          |          |
|---|----------|----------|----------|
| F | 2.20840  | -2.55160 | -0.00020 |
| F | 1.67890  | -1.19330 | -2.34230 |
| F | 1.50200  | 2.49370  | 0.00050  |
| C | -3.89450 | -0.67250 | -0.00040 |
| C | -3.33720 | -0.24690 | 1.20570  |
| C | -2.22470 | 0.59330  | 1.20920  |
| C | -3.33700 | -0.24660 | -1.20630 |
| C | -2.22450 | 0.59370  | -1.20940 |
| C | -1.66500 | 1.01250  | 0.00000  |
| H | -4.76110 | -1.32560 | -0.00060 |
| H | -3.76880 | -0.56930 | 2.14800  |
| H | -1.77850 | 0.92930  | 2.13730  |
| H | -3.76840 | -0.56870 | -2.14880 |
| H | -1.77810 | 0.92990  | -2.13730 |
| O | -0.59950 | 1.88870  | 0.00020  |

22

TFP2subPhenoxyFirstInt.xyz

|   |          |          |          |
|---|----------|----------|----------|
| C | 1.44560  | -0.47750 | -1.16860 |
| N | 1.61230  | 0.82370  | -1.18710 |
| C | 1.65000  | 1.39730  | 0.00030  |
| N | 1.61190  | 0.82350  | 1.18740  |
| C | 1.44510  | -0.47780 | 1.16870  |
| C | 1.34690  | -1.21850 | -0.00000 |
| F | 1.38380  | -1.10720 | 2.33740  |
| F | 1.18050  | -2.54490 | -0.00020 |
| F | 1.38460  | -1.10670 | -2.33740 |
| F | 1.86170  | 2.70530  | 0.00040  |
| C | -3.62560 | -1.16740 | -0.00010 |
| C | -3.16640 | -0.61140 | 1.20090  |
| C | -2.27760 | 0.45660  | 1.20960  |
| C | -3.16660 | -0.61120 | -1.20120 |
| C | -2.27780 | 0.45680  | -1.20980 |
| C | -1.77990 | 1.05650  | -0.00010 |
| H | -4.32100 | -2.00120 | -0.00020 |
| H | -3.51070 | -1.02350 | 2.14830  |
| H | -1.93330 | 0.87810  | 2.15230  |
| H | -3.51110 | -1.02320 | -2.14860 |
| H | -1.93360 | 0.87850  | -2.15250 |
| O | -0.95860 | 2.03900  | -0.00010 |

22

TFP4subPhenoxy.xyz

|   |          |         |         |
|---|----------|---------|---------|
| C | -1.38510 | 0.42810 | 1.29730 |
|---|----------|---------|---------|

|   |          |          |          |
|---|----------|----------|----------|
| C | -1.53180 | 0.91180  | 0.02940  |
| C | -1.42290 | -0.02840 | -1.02460 |
| N | -1.36570 | -1.33440 | -0.74190 |
| C | -1.23580 | -1.63680 | 0.52720  |
| N | -1.23790 | -0.86300 | 1.59020  |
| F | -1.11610 | -2.95060 | 0.78730  |
| F | -1.40600 | 1.27510  | 2.33610  |
| F | -1.67210 | 2.22650  | -0.22990 |
| F | -1.99980 | 0.28650  | -2.19780 |
| C | 3.60180  | 0.01330  | 0.77090  |
| C | 3.26950  | -1.00300 | -0.13040 |
| C | 2.18350  | -0.86640 | -0.98880 |
| C | 2.82670  | 1.17550  | 0.79200  |
| C | 1.74020  | 1.32310  | -0.06580 |
| C | 1.38370  | 0.30820  | -0.99500 |
| H | 4.45040  | -0.09700 | 1.43870  |
| H | 3.86370  | -1.91310 | -0.16010 |
| H | 1.92840  | -1.65610 | -1.68990 |
| H | 3.07280  | 1.97590  | 1.48550  |
| H | 1.14590  | 2.23240  | -0.05170 |
| O | 0.36620  | 0.44380  | -1.81190 |

22

TFP4subPhenoxy1stIntermediate.xyz

|   |          |          |          |
|---|----------|----------|----------|
| C | -1.23850 | 0.42590  | 1.25270  |
| C | -1.56070 | 0.87810  | -0.00980 |
| C | -1.67460 | -0.10810 | -0.98450 |
| N | -1.52510 | -1.39000 | -0.72120 |
| C | -1.21640 | -1.66850 | 0.52840  |
| N | -1.06940 | -0.85160 | 1.54710  |
| F | -1.04510 | -2.96300 | 0.80030  |
| F | -1.10170 | 1.30060  | 2.24610  |
| F | -1.72420 | 2.17480  | -0.28450 |
| F | -2.07850 | 0.22250  | -2.19980 |
| C | 3.70420  | -0.02540 | 0.90540  |
| C | 3.40520  | -0.99590 | -0.06010 |
| C | 2.38960  | -0.80110 | -0.98760 |
| C | 2.95120  | 1.15430  | 0.91160  |
| C | 1.93070  | 1.36390  | -0.00940 |
| C | 1.59830  | 0.39870  | -1.02100 |
| H | 4.50090  | -0.18280 | 1.62590  |
| H | 3.97740  | -1.92180 | -0.08470 |
| H | 2.17160  | -1.56260 | -1.73370 |
| H | 3.16470  | 1.92330  | 1.65210  |
| H | 1.35880  | 2.28950  | 0.00540  |

|   |         |         |          |
|---|---------|---------|----------|
| O | 0.66270 | 0.58880 | -1.87760 |
|---|---------|---------|----------|

22

TFP4subPhenoxy2ndIntermediate.xyz

|   |          |          |          |
|---|----------|----------|----------|
| C | -1.54810 | 0.39760  | 1.31770  |
| C | -1.29380 | 0.90940  | 0.09590  |
| C | -0.93450 | 0.00870  | -1.00830 |
| N | -0.94730 | -1.34330 | -0.65800 |
| C | -1.23950 | -1.64660 | 0.57060  |
| N | -1.54200 | -0.91060 | 1.62200  |
| F | -1.22560 | -2.98260 | 0.83300  |
| F | -1.83370 | 1.23050  | 2.34560  |
| F | -1.29550 | 2.25540  | -0.14250 |
| F | -1.82440 | 0.22170  | -2.10950 |
| C | 3.86810  | 0.11630  | 0.48380  |
| C | 3.44450  | -0.94890 | -0.31160 |
| C | 2.24420  | -0.86710 | -1.01610 |
| C | 3.08750  | 1.26950  | 0.56600  |
| C | 1.88730  | 1.35850  | -0.13760 |
| C | 1.46500  | 0.28790  | -0.92920 |
| H | 4.80240  | 0.05010  | 1.03160  |
| H | 4.04820  | -1.84800 | -0.38330 |
| H | 1.89970  | -1.68660 | -1.63550 |
| H | 3.41240  | 2.10420  | 1.17900  |
| H | 1.27320  | 2.25000  | -0.08370 |
| O | 0.30800  | 0.39320  | -1.67470 |

22

TFP5subPhenoxy1stINT.xyz

|   |          |          |          |
|---|----------|----------|----------|
| N | 1.48860  | 1.12310  | 1.09670  |
| C | 1.62310  | -0.18320 | 1.19030  |
| C | 1.70520  | -1.02150 | 0.09210  |
| C | 1.60320  | -0.38620 | -1.13400 |
| N | 1.46640  | 0.91600  | -1.26570 |
| C | 1.42380  | 1.58600  | -0.13320 |
| F | 1.29740  | 2.90670  | -0.24770 |
| F | 1.67230  | -0.70660 | 2.40930  |
| F | 1.86460  | -2.33640 | 0.20550  |
| F | 1.64000  | -1.11150 | -2.24460 |
| C | -3.90970 | 1.26910  | -0.06250 |
| C | -3.47430 | 0.62960  | -1.23040 |
| C | -2.49130 | -0.35140 | -1.19320 |
| C | -3.32770 | 0.88690  | 1.15290  |
| C | -2.34440 | -0.09360 | 1.20720  |

|   |          |          |          |
|---|----------|----------|----------|
| C | -1.86560 | -0.77210 | 0.03220  |
| H | -4.67800 | 2.03550  | -0.09780 |
| H | -3.91130 | 0.90700  | -2.18850 |
| H | -2.16340 | -0.83660 | -2.11090 |
| H | -3.64870 | 1.36780  | 2.07570  |
| H | -1.90310 | -0.37690 | 2.16110  |
| O | -0.95400 | -1.67130 | 0.07150  |

22

TFP5subPhenoxy2ndINT.xyz

|   |          |          |          |
|---|----------|----------|----------|
| N | 1.65940  | 1.20940  | 1.07130  |
| C | 1.16860  | -0.00220 | 1.15390  |
| C | 0.86740  | -0.90660 | 0.07440  |
| C | 1.14770  | -0.18950 | -1.14320 |
| N | 1.63810  | 1.01870  | -1.26670 |
| C | 1.87420  | 1.66160  | -0.14420 |
| F | 2.37110  | 2.92440  | -0.25190 |
| F | 0.92180  | -0.47170 | 2.41350  |
| F | 1.68680  | -2.17970 | 0.17180  |
| F | 0.87840  | -0.85640 | -2.30480 |
| C | -3.88350 | 0.73230  | -0.05470 |
| C | -3.33250 | 0.19420  | -1.21790 |
| C | -2.16590 | -0.56680 | -1.15720 |
| C | -3.26370 | 0.50100  | 1.17350  |
| C | -2.09820 | -0.26090 | 1.24150  |
| C | -1.55010 | -0.79850 | 0.07460  |
| H | -4.79110 | 1.32470  | -0.10460 |
| H | -3.80980 | 0.36810  | -2.17700 |
| H | -1.72420 | -0.98720 | -2.05320 |
| H | -3.68770 | 0.91410  | 2.08320  |
| H | -1.60780 | -0.44800 | 2.18970  |
| O | -0.43110 | -1.60500 | 0.14040  |

22

TFP5subPhenoxyTS.xyz

|   |         |          |          |
|---|---------|----------|----------|
| N | 1.58660 | 1.18090  | 1.07830  |
| C | 1.34990 | -0.10720 | 1.15830  |
| C | 1.10080 | -0.99840 | 0.07300  |
| C | 1.34930 | -0.28960 | -1.14010 |
| N | 1.58370 | 0.99490  | -1.26410 |
| C | 1.68240 | 1.66810  | -0.13870 |
| F | 1.92530 | 2.99800  | -0.24480 |
| F | 1.26850 | -0.63510 | 2.40730  |
| F | 1.71150 | -2.26300 | 0.17320  |

|   |          |          |          |
|---|----------|----------|----------|
| F | 1.26800  | -1.00720 | -2.28990 |
| C | -3.65410 | 0.96340  | -0.04980 |
| C | -3.16380 | 0.37210  | -1.21600 |
| C | -2.08060 | -0.50210 | -1.16240 |
| C | -3.04940 | 0.66810  | 1.17330  |
| C | -1.96780 | -0.20820 | 1.23360  |
| C | -1.47270 | -0.81760 | 0.06630  |
| H | -4.49780 | 1.64450  | -0.09370 |
| H | -3.62540 | 0.59680  | -2.17310 |
| H | -1.69330 | -0.96470 | -2.06480 |
| H | -3.42190 | 1.12380  | 2.08620  |
| H | -1.49660 | -0.44460 | 2.18220  |
| O | -0.44760 | -1.68900 | 0.12090  |

21

TFPprod2.xyz

|   |          |          |          |
|---|----------|----------|----------|
| C | 2.61460  | -0.90190 | 0.00020  |
| N | 1.45530  | -1.50970 | 0.00000  |
| C | 0.38460  | -0.71410 | -0.00040 |
| N | 0.38890  | 0.61550  | -0.00080 |
| C | 1.57090  | 1.18650  | -0.00050 |
| C | 2.76230  | 0.47950  | 0.00000  |
| F | 1.60970  | 2.51460  | -0.00080 |
| F | 3.95820  | 1.07630  | 0.00030  |
| F | 3.70570  | -1.66050 | 0.00070  |
| C | -4.45600 | 0.59740  | 0.00060  |
| C | -3.83630 | 0.27800  | -1.20740 |
| C | -2.59470 | -0.35640 | -1.21400 |
| C | -3.83520 | 0.27890  | 1.20830  |
| C | -2.59360 | -0.35540 | 1.21410  |
| C | -1.99250 | -0.65930 | -0.00010 |
| H | -5.42260 | 1.08910  | 0.00090  |
| H | -4.31800 | 0.51990  | -2.14850 |
| H | -2.10120 | -0.61840 | -2.14280 |
| H | -4.31600 | 0.52160  | 2.14960  |
| H | -2.09910 | -0.61660 | 2.14280  |
| O | -0.78260 | -1.37610 | -0.00040 |

21

TFPprod4.xyz

|   |          |          |          |
|---|----------|----------|----------|
| C | -1.59790 | 1.60110  | -0.00000 |
| N | -0.46310 | 0.93590  | -0.00000 |
| C | -0.57000 | -0.38890 | -0.00000 |
| C | -1.82400 | -1.01360 | 0.00000  |

|   |          |          |          |
|---|----------|----------|----------|
| C | -2.91970 | -0.17530 | 0.00000  |
| N | -2.83010 | 1.14180  | -0.00000 |
| F | -1.48210 | 2.92810  | -0.00000 |
| F | -1.94600 | -2.34530 | 0.00000  |
| F | -4.14010 | -0.70020 | 0.00000  |
| C | 4.38160  | 0.36620  | 0.00000  |
| C | 3.72970  | 0.11970  | -1.20810 |
| C | 2.42420  | -0.36980 | -1.21490 |
| C | 3.72970  | 0.11980  | 1.20810  |
| C | 2.42420  | -0.36970 | 1.21490  |
| C | 1.79520  | -0.60230 | 0.00000  |
| H | 5.39780  | 0.74500  | 0.00000  |
| H | 4.23520  | 0.30610  | -2.14920 |
| H | 1.90290  | -0.57310 | -2.14310 |
| H | 4.23520  | 0.30620  | 2.14920  |
| H | 1.90280  | -0.57300 | 2.14310  |
| O | 0.50680  | -1.17780 | -0.00000 |

21

TFPprod5.xyz

|   |          |          |          |
|---|----------|----------|----------|
| N | -2.39090 | -1.31150 | 0.15610  |
| C | -1.17550 | -1.00040 | 0.55110  |
| C | -0.64010 | 0.28610  | 0.49970  |
| C | -1.52240 | 1.23580  | -0.01150 |
| N | -2.74850 | 0.96580  | -0.40840 |
| C | -3.09920 | -0.29800 | -0.29860 |
| F | -4.33080 | -0.59110 | -0.69820 |
| F | -0.42370 | -1.98640 | 1.02100  |
| F | -1.12570 | 2.49650  | -0.10160 |
| C | 4.16170  | -0.38740 | -0.88620 |
| C | 4.13580  | 0.11370  | 0.41650  |
| C | 2.92600  | 0.43450  | 1.02400  |
| C | 2.96630  | -0.56090 | -1.57870 |
| C | 1.74420  | -0.24020 | -0.98440 |
| C | 1.74060  | 0.25360  | 0.31570  |
| H | 5.10600  | -0.63860 | -1.35610 |
| H | 5.06030  | 0.25390  | 0.96610  |
| H | 2.88510  | 0.82180  | 2.03550  |
| H | 2.97380  | -0.94550 | -2.59290 |
| H | 0.82240  | -0.36740 | -1.53940 |
| O | 0.57820  | 0.62560  | 0.99710  |

35

TFPsecondSub2TS.xyz

|   |          |          |          |
|---|----------|----------|----------|
| C | -0.11150 | 2.50510  | 1.21670  |
| C | -0.05610 | 2.70820  | -0.12690 |
| C | -0.75300 | 1.77800  | -0.96740 |
| N | -1.56240 | 0.87990  | -0.35510 |
| C | -1.51590 | 0.80730  | 0.95850  |
| N | -0.82970 | 1.56010  | 1.81510  |
| O | -2.28230 | -0.13420 | 1.58910  |
| F | 0.59170  | 3.31730  | 2.03150  |
| F | 0.71640  | 3.67870  | -0.68480 |
| F | -1.32400 | 2.34310  | -2.08560 |
| C | 3.41410  | -1.26690 | -0.12360 |
| C | 2.36520  | -1.93670 | -0.76390 |
| C | 1.34860  | -1.20140 | -1.34290 |
| C | 3.45260  | 0.12980  | -0.07200 |
| C | 2.43670  | 0.86120  | -0.66050 |
| C | 1.35850  | 0.21480  | -1.31500 |
| O | 0.39710  | 0.88980  | -1.92000 |
| N | 4.48280  | -2.03380 | 0.48790  |
| O | 5.39540  | -1.42690 | 1.05270  |
| O | 4.43750  | -3.26410 | 0.42030  |
| H | 2.35840  | -3.01810 | -0.79080 |
| H | 0.52440  | -1.69780 | -1.84210 |
| H | 4.28080  | 0.62360  | 0.41850  |
| H | 2.47140  | 1.94340  | -0.65080 |
| C | -5.17540 | -1.61640 | -0.12320 |
| C | -4.65460 | -2.85500 | -0.49750 |
| C | -3.32920 | -3.16950 | -0.19650 |
| C | -4.37580 | -0.69050 | 0.54540  |
| C | -3.05470 | -1.01590 | 0.83430  |
| C | -2.52300 | -2.24920 | 0.47200  |
| H | -6.20690 | -1.36790 | -0.35020 |
| H | -5.27990 | -3.57390 | -1.01600 |
| H | -2.91980 | -4.13330 | -0.48020 |
| H | -4.76710 | 0.27480  | 0.84660  |
| H | -1.49270 | -2.48040 | 0.71800  |

35

TFPsecSub2firstINT.xyz

|   |          |          |          |
|---|----------|----------|----------|
| C | -0.14630 | 2.41310  | 1.18200  |
| C | -0.35580 | 2.81710  | -0.12580 |
| C | -1.31400 | 2.08820  | -0.81210 |
| N | -1.97760 | 1.08910  | -0.27920 |
| C | -1.67440 | 0.79430  | 0.98090  |
| N | -0.78800 | 1.42160  | 1.75230  |
| O | -2.30100 | -0.22700 | 1.59420  |

|   |          |          |          |
|---|----------|----------|----------|
| F | 0.75940  | 3.05720  | 1.91580  |
| F | 0.33070  | 3.81900  | -0.68690 |
| F | -1.61960 | 2.43180  | -2.05530 |
| C | 3.56730  | -1.43590 | -0.09870 |
| C | 2.54070  | -2.09850 | -0.80930 |
| C | 1.60710  | -1.37800 | -1.50710 |
| C | 3.62470  | -0.02400 | -0.10860 |
| C | 2.69270  | 0.70160  | -0.80360 |
| C | 1.62350  | 0.07270  | -1.55760 |
| O | 0.77240  | 0.73600  | -2.20450 |
| N | 4.53330  | -2.18210 | 0.61660  |
| O | 5.43940  | -1.58130 | 1.22820  |
| O | 4.46140  | -3.42750 | 0.62230  |
| H | 2.50940  | -3.18090 | -0.79130 |
| H | 0.81870  | -1.88430 | -2.05640 |
| H | 4.41610  | 0.46890  | 0.44250  |
| H | 2.73550  | 1.78690  | -0.81210 |
| C | -5.29190 | -1.68710 | 0.01890  |
| C | -4.76430 | -2.88080 | -0.47420 |
| C | -3.41230 | -3.17150 | -0.29460 |
| C | -4.47320 | -0.77930 | 0.68920  |
| C | -3.12790 | -1.08480 | 0.85060  |
| C | -2.58360 | -2.26960 | 0.37150  |
| H | -6.34390 | -1.45960 | -0.11560 |
| H | -5.40660 | -3.58430 | -0.99280 |
| H | -2.99830 | -4.10040 | -0.67170 |
| H | -4.86810 | 0.15050  | 1.08230  |
| H | -1.53070 | -2.47840 | 0.52350  |

35

TFPsecSub2secondINT.xyz

|   |          |          |          |
|---|----------|----------|----------|
| C | -0.20390 | 2.48910  | 1.20850  |
| C | -0.03410 | 2.60250  | -0.12850 |
| C | -0.64100 | 1.60610  | -1.00540 |
| N | -1.44440 | 0.68400  | -0.35440 |
| C | -1.53290 | 0.73820  | 0.95170  |
| N | -0.95610 | 1.57040  | 1.81750  |
| O | -2.33130 | -0.18680 | 1.58730  |
| F | 0.42210  | 3.36730  | 2.02780  |
| F | 0.77370  | 3.55980  | -0.68220 |
| F | -1.36980 | 2.23740  | -2.05210 |
| C | 3.37280  | -1.32010 | -0.15810 |
| C | 2.30430  | -1.96890 | -0.77690 |
| C | 1.28920  | -1.20620 | -1.33470 |
| C | 3.45110  | 0.07090  | -0.10350 |



|   |          |          |          |
|---|----------|----------|----------|
| C | 2.43620  | 0.82620  | -0.67070 |
| C | 1.34430  | 0.19380  | -1.28630 |
| O | 0.36300  | 0.91410  | -1.88840 |
| N | 4.44040  | -2.11730 | 0.44620  |
| O | 5.36190  | -1.52710 | 1.00530  |
| O | 4.36690  | -3.34150 | 0.37000  |
| H | 2.27290  | -3.04940 | -0.80630 |
| H | 0.44240  | -1.67940 | -1.81620 |
| H | 4.29860  | 0.54490  | 0.37220  |
| H | 2.48720  | 1.90690  | -0.65650 |
| C | -5.19610 | -1.68090 | -0.15530 |
| C | -4.67900 | -2.93040 | -0.49710 |
| C | -3.36200 | -3.24920 | -0.16450 |
| C | -4.40050 | -0.74990 | 0.51090  |
| C | -3.08690 | -1.07820 | 0.83350  |
| C | -2.56110 | -2.32360 | 0.50310  |
| H | -6.22120 | -1.42820 | -0.40580 |
| H | -5.30020 | -3.65400 | -1.01420 |
| H | -2.95510 | -4.22130 | -0.42330 |
| H | -4.78930 | 0.22400  | 0.78740  |
| H | -1.53760 | -2.55890 | 0.77240  |

10

TFPyrazine.xyz

|   |          |          |         |
|---|----------|----------|---------|
| N | 1.37491  | -0.00000 | 0.00000 |
| C | 0.69691  | -1.12114 | 0.00000 |
| C | -0.69691 | -1.12114 | 0.00000 |
| N | -1.37491 | 0.00000  | 0.00000 |
| C | -0.69691 | 1.12114  | 0.00000 |
| C | 0.69691  | 1.12114  | 0.00000 |
| F | -1.37082 | 2.26758  | 0.00000 |
| F | 1.37082  | 2.26757  | 0.00000 |
| F | 1.37082  | -2.26757 | 0.00000 |
| F | -1.37082 | -2.26758 | 0.00000 |

22

TFPyrazine2ndInt.xyz

|   |         |          |          |
|---|---------|----------|----------|
| N | 1.61280 | 0.21490  | 1.43710  |
| C | 1.21210 | -0.83210 | 0.81590  |
| C | 0.84570 | -0.89720 | -0.61370 |
| N | 0.95870 | 0.31250  | -1.25950 |
| C | 1.38500 | 1.35780  | -0.58860 |
| C | 1.71620 | 1.35230  | 0.74090  |
| F | 2.12760 | 2.47110  | 1.41060  |

|   |          |          |          |
|---|----------|----------|----------|
| F | 1.09020  | -1.99300 | 1.52550  |
| F | 1.67810  | -1.90150 | -1.26080 |
| C | -3.88540 | 0.45060  | 0.39370  |
| C | -3.38710 | 0.64220  | -0.89560 |
| C | -2.22740 | -0.01270 | -1.30690 |
| C | -3.22070 | -0.40710 | 1.26990  |
| C | -2.06100 | -1.06670 | 0.86410  |
| C | -1.56270 | -0.86880 | -0.42590 |
| H | -4.78820 | 0.96200  | 0.71090  |
| H | -3.90090 | 1.30570  | -1.58410 |
| H | -1.82610 | 0.12990  | -2.30290 |
| H | -3.60440 | -0.56550 | 2.27270  |
| H | -1.53750 | -1.73860 | 1.53480  |
| O | -0.44430 | -1.55980 | -0.84430 |
| F | 1.47830  | 2.52090  | -1.28920 |

22

TFPyrazineFirstInt.xyz

|   |          |          |          |
|---|----------|----------|----------|
| N | 1.36310  | 0.10890  | 1.37800  |
| C | 1.53690  | -0.97220 | 0.66880  |
| C | 1.68760  | -0.91550 | -0.72060 |
| N | 1.66910  | 0.22420  | -1.35740 |
| C | 1.48000  | 1.31370  | -0.64130 |
| C | 1.33210  | 1.25800  | 0.73250  |
| F | 1.15730  | 2.37340  | 1.44840  |
| F | 1.59670  | -2.14090 | 1.30330  |
| F | 1.92330  | -2.02370 | -1.41350 |
| C | -3.80530 | 0.94450  | 0.48070  |
| C | -3.29420 | 0.92850  | -0.82350 |
| C | -2.31210 | 0.02180  | -1.20320 |
| C | -3.30270 | 0.01290  | 1.39760  |
| C | -2.31920 | -0.89900 | 1.03350  |
| C | -1.76580 | -0.94630 | -0.29170 |
| H | -4.57390 | 1.65450  | 0.77040  |
| H | -3.67080 | 1.64100  | -1.55570 |
| H | -1.92670 | 0.02280  | -2.22110 |
| H | -3.68550 | 0.00280  | 2.41680  |
| H | -1.93880 | -1.61650 | 1.75790  |
| O | -0.85310 | -1.78280 | -0.63020 |
| F | 1.44180  | 2.48470  | -1.28440 |

22

TFPyrazineTransitionState.xyz

|   |         |         |         |
|---|---------|---------|---------|
| N | 1.55638 | 0.16162 | 1.43302 |
|---|---------|---------|---------|

|   |          |          |          |
|---|----------|----------|----------|
| C | 1.46741  | -0.93155 | 0.75788  |
| C | 1.21457  | -0.97281 | -0.66189 |
| N | 1.30010  | 0.18792  | -1.31984 |
| C | 1.37230  | 1.29690  | -0.60894 |
| C | 1.49580  | 1.30973  | 0.75650  |
| F | 1.59048  | 2.46185  | 1.46545  |
| F | 1.55187  | -2.10503 | 1.42110  |
| F | 1.74870  | -2.04535 | -1.32367 |
| C | -3.60484 | 0.77694  | 0.44112  |
| C | -3.09523 | 0.88327  | -0.85533 |
| C | -2.03894 | 0.07688  | -1.27107 |
| C | -3.04344 | -0.15445 | 1.31801  |
| C | -1.98568 | -0.96271 | 0.91009  |
| C | -1.45982 | -0.87198 | -0.39858 |
| H | -4.43117 | 1.40409  | 0.76030  |
| H | -3.52582 | 1.60129  | -1.54812 |
| H | -1.64495 | 0.15404  | -2.27913 |
| H | -3.43261 | -0.25004 | 2.32807  |
| H | -1.55054 | -1.69154 | 1.58768  |
| O | -0.46553 | -1.66322 | -0.79468 |
| F | 1.37352  | 2.45962  | -1.29736 |

22

TFPyridazine3firstINT.xyz

|   |          |          |          |
|---|----------|----------|----------|
| C | 1.45280  | 0.74810  | 0.49140  |
| C | 1.57290  | -0.61410 | 0.53660  |
| C | 1.56820  | -1.27680 | -0.70380 |
| N | 1.46560  | -0.68850 | -1.85760 |
| N | 1.33940  | 0.65630  | -1.90000 |
| C | 1.33390  | 1.32210  | -0.78570 |
| F | 1.21390  | 2.64990  | -0.86480 |
| F | 1.45390  | 1.49710  | 1.59190  |
| F | 1.75520  | -1.26390 | 1.67510  |
| F | 1.72780  | -2.59720 | -0.70620 |
| C | -3.72930 | 1.27420  | 0.17130  |
| C | -3.59000 | 0.32830  | -0.85330 |
| C | -2.63410 | -0.67690 | -0.78150 |
| C | -2.87520 | 1.18130  | 1.27610  |
| C | -1.91200 | 0.18170  | 1.36200  |
| C | -1.74430 | -0.81300 | 0.33870  |
| H | -4.48010 | 2.05600  | 0.11030  |
| H | -4.24130 | 0.38080  | -1.72420 |
| H | -2.54040 | -1.40610 | -1.58420 |
| H | -2.96280 | 1.90490  | 2.08480  |
| H | -1.26100 | 0.12220  | 2.23220  |

|   |          |          |         |
|---|----------|----------|---------|
| O | -0.86530 | -1.74570 | 0.41560 |
|---|----------|----------|---------|

21

TFPyridazine3Prod.xyz

|   |          |          |          |
|---|----------|----------|----------|
| C | 2.77334  | 0.26185  | 0.00005  |
| C | 1.62896  | 1.00966  | 0.00001  |
| C | 0.39819  | 0.31139  | -0.00012 |
| N | 0.32854  | -1.00166 | -0.00021 |
| N | 1.45710  | -1.73168 | -0.00017 |
| C | 2.60907  | -1.13450 | -0.00005 |
| F | 3.70431  | -1.89642 | -0.00002 |
| F | 3.97884  | 0.81675  | 0.00017  |
| F | 1.66383  | 2.33671  | 0.00010  |
| C | -4.53428 | -0.59026 | 0.00018  |
| C | -3.88922 | -0.32480 | 1.20800  |
| C | -2.59878 | 0.20294  | 1.21416  |
| C | -3.88974 | -0.32410 | -1.20775 |
| C | -2.59930 | 0.20364  | -1.21416 |
| C | -1.97506 | 0.45596  | -0.00006 |
| H | -5.53906 | -0.99840 | 0.00028  |
| H | -4.38900 | -0.52574 | 2.14929  |
| H | -2.08373 | 0.42153  | 2.14253  |
| H | -4.38993 | -0.52449 | -2.14894 |
| H | -2.08464 | 0.42277  | -2.14262 |
| O | -0.70937 | 1.07421  | -0.00020 |

22

TFPyridazine3secondINT.xyz

|   |          |          |          |
|---|----------|----------|----------|
| C | 1.74960  | 0.90190  | 0.44840  |
| C | 1.26340  | -0.33800 | 0.67290  |
| C | 0.69010  | -1.12210 | -0.42390 |
| N | 0.62170  | -0.49930 | -1.66110 |
| N | 1.14610  | 0.72510  | -1.84060 |
| C | 1.67380  | 1.39340  | -0.87380 |
| F | 2.15980  | 2.64130  | -1.13010 |
| F | 2.27530  | 1.65260  | 1.43610  |
| F | 1.28070  | -0.87640 | 1.91660  |
| F | 1.46440  | -2.36960 | -0.52620 |
| C | -3.90610 | 0.73220  | 0.41240  |
| C | -3.59920 | 0.19800  | -0.83970 |
| C | -2.47860 | -0.61470 | -1.00420 |
| C | -3.08790 | 0.44370  | 1.50450  |
| C | -1.96630 | -0.36940 | 1.34650  |
| C | -1.66010 | -0.89990 | 0.09110  |

|   |          |          |          |
|---|----------|----------|----------|
| H | -4.77910 | 1.36470  | 0.53650  |
| H | -4.23310 | 0.41560  | -1.69350 |
| H | -2.22280 | -1.03120 | -1.97030 |
| H | -3.32100 | 0.85190  | 2.48290  |
| H | -1.32290 | -0.60160 | 2.18780  |
| O | -0.58190 | -1.74930 | -0.04760 |

22

TFPyridazine3TS.xyz

|   |          |          |          |
|---|----------|----------|----------|
| C | 1.68531  | 0.85434  | 0.49550  |
| C | 1.53331  | -0.48314 | 0.64357  |
| C | 1.03680  | -1.24964 | -0.47189 |
| N | 0.96892  | -0.67808 | -1.68882 |
| N | 1.11548  | 0.66052  | -1.80885 |
| C | 1.44297  | 1.38222  | -0.79278 |
| F | 1.59238  | 2.71603  | -0.97227 |
| F | 2.07531  | 1.64757  | 1.50533  |
| F | 1.76442  | -1.08861 | 1.82008  |
| F | 1.52393  | -2.53721 | -0.51275 |
| C | -3.59282 | 1.03691  | 0.25746  |
| C | -3.34242 | 0.34478  | -0.92976 |
| C | -2.32215 | -0.60082 | -0.99796 |
| C | -2.80937 | 0.76580  | 1.38153  |
| C | -1.78658 | -0.17727 | 1.31973  |
| C | -1.52308 | -0.88852 | 0.12892  |
| H | -4.39106 | 1.77057  | 0.30796  |
| H | -3.94736 | 0.54462  | -1.80997 |
| H | -2.12826 | -1.14482 | -1.91644 |
| H | -2.99580 | 1.29453  | 2.31227  |
| H | -1.17891 | -0.39430 | 2.19342  |
| O | -0.56071 | -1.81195 | 0.07838  |

22

TFPyridazine4firstINT.xyz

|   |         |          |          |
|---|---------|----------|----------|
| N | 1.21300 | -0.62010 | 1.80120  |
| C | 1.51670 | -1.16480 | 0.66230  |
| C | 1.66860 | -0.46700 | -0.54910 |
| C | 1.49070 | 0.88990  | -0.47960 |
| C | 1.16050 | 1.41590  | 0.77680  |
| N | 1.03530 | 0.71760  | 1.86660  |
| F | 1.70380 | -2.48490 | 0.64930  |
| F | 2.08660 | -1.06720 | -1.65120 |
| F | 1.60160 | 1.67020  | -1.55370 |
| F | 0.97130 | 2.73500  | 0.87140  |

|   |          |          |          |
|---|----------|----------|----------|
| C | -3.82390 | 0.62000  | 0.53330  |
| C | -3.00470 | 1.26310  | -0.40100 |
| C | -1.93420 | 0.60450  | -0.99770 |
| C | -3.54090 | -0.71420 | 0.85510  |
| C | -2.47360 | -1.38370 | 0.27160  |
| C | -1.61200 | -0.76230 | -0.69500 |
| H | -4.65950 | 1.13890  | 0.99280  |
| H | -3.20660 | 2.29890  | -0.66850 |
| H | -1.31430 | 1.11710  | -1.73050 |
| H | -4.16510 | -1.23610 | 1.57830  |
| H | -2.26530 | -2.41980 | 0.53050  |
| O | -0.62560 | -1.38150 | -1.23740 |

21

TFPyridazine4Prod.xyz

|   |          |          |          |
|---|----------|----------|----------|
| N | -3.09986 | 0.97084  | 0.32852  |
| C | -1.88667 | 1.38749  | 0.12283  |
| C | -0.77063 | 0.57403  | -0.19363 |
| C | -1.06713 | -0.77091 | -0.29208 |
| C | -2.39212 | -1.15805 | -0.04374 |
| N | -3.36452 | -0.34489 | 0.25067  |
| F | -1.67939 | 2.70137  | 0.21274  |
| F | -0.15433 | -1.68445 | -0.61091 |
| F | -2.68652 | -2.45552 | -0.12479 |
| C | 4.10638  | -0.55184 | 0.42208  |
| C | 3.86607  | 0.05012  | -0.81275 |
| C | 2.61663  | 0.59846  | -1.09696 |
| C | 3.09536  | -0.59745 | 1.38150  |
| C | 1.84295  | -0.04685 | 1.11448  |
| C | 1.62434  | 0.53478  | -0.12840 |
| H | 5.07915  | -0.97937 | 0.63811  |
| H | 4.64923  | 0.09176  | -1.56164 |
| H | 2.40647  | 1.06870  | -2.05032 |
| H | 3.27895  | -1.05593 | 2.34691  |
| H | 1.05914  | -0.06269 | 1.86346  |
| O | 0.40610  | 1.17307  | -0.42802 |

22

TFPyridazine4secondINT.xyz

|   |         |          |          |
|---|---------|----------|----------|
| N | 1.43010 | -0.53260 | 1.88220  |
| C | 1.19350 | -1.11310 | 0.76250  |
| C | 1.02240 | -0.53470 | -0.58090 |
| C | 1.21120 | 0.88740  | -0.42940 |
| C | 1.45020 | 1.44510  | 0.79790  |

|   |          |          |          |
|---|----------|----------|----------|
| N | 1.57290  | 0.81740  | 1.95500  |
| F | 1.05300  | -2.47290 | 0.80050  |
| F | 1.96190  | -1.12410 | -1.50750 |
| F | 1.08480  | 1.67040  | -1.54670 |
| F | 1.57750  | 2.79390  | 0.86400  |
| C | -3.87670 | 0.19050  | 0.33380  |
| C | -3.18650 | 1.05360  | -0.51770 |
| C | -1.94750 | 0.68560  | -1.03960 |
| C | -3.32300 | -1.04760 | 0.65960  |
| C | -2.08320 | -1.42190 | 0.14230  |
| C | -1.39800 | -0.55450 | -0.70940 |
| H | -4.84120 | 0.47940  | 0.73790  |
| H | -3.61210 | 2.01750  | -0.77760 |
| H | -1.40030 | 1.34790  | -1.69990 |
| H | -3.85510 | -1.72540 | 1.31920  |
| H | -1.63980 | -2.38030 | 0.38810  |
| O | -0.19930 | -0.95570 | -1.27100 |

22

TFPyridazine4TS.xyz

|   |          |          |          |
|---|----------|----------|----------|
| N | 1.37644  | -0.56744 | 1.85405  |
| C | 1.47447  | -1.15580 | 0.70932  |
| C | 1.39842  | -0.54256 | -0.58000 |
| C | 1.41561  | 0.85075  | -0.48282 |
| C | 1.28983  | 1.42477  | 0.77280  |
| N | 1.27179  | 0.78405  | 1.91507  |
| F | 1.61051  | -2.49694 | 0.72401  |
| F | 2.03587  | -1.13716 | -1.61506 |
| F | 1.45393  | 1.60894  | -1.59967 |
| F | 1.20918  | 2.76628  | 0.84580  |
| C | -3.70859 | 0.46649  | 0.46054  |
| C | -2.92716 | 1.22740  | -0.41107 |
| C | -1.77744 | 0.69245  | -0.98809 |
| C | -3.32004 | -0.84544 | 0.74935  |
| C | -2.16955 | -1.38489 | 0.18399  |
| C | -1.37015 | -0.63730 | -0.71636 |
| H | -4.60567 | 0.88561  | 0.90502  |
| H | -3.21696 | 2.24841  | -0.64528 |
| H | -1.18003 | 1.28369  | -1.67527 |
| H | -3.91771 | -1.44918 | 1.42726  |
| H | -1.86510 | -2.40335 | 0.40879  |
| O | -0.29626 | -1.16585 | -1.27326 |
